# Supplementary material
Source: PubMed Central journal article supplement (PMC8596197)
Supplement: jama-e2118463-s002.pdf [file jama-e2118463-s002.pdf]

## Supplemental Online Content

Pieske B, Wachter R, Shah SJ, et al. Effect of sacubitril/valsartan vs standard medical therapies on plasma NT-proBNP concentration and submaximal exercise capacity in patients with heart failure and preserved ejection fraction: the PARALLAX randomized clinical trial. *JAMA*. doi:10.1001/jama.2021.18463

**eTable 1.** Key eligibility criteria

**eTable 2.** Secondary endpoint changes at week 24 by stratum

**eTable 3.** Incidence of death, key serious AEs and Aes (safety set)

**eTable 4.** Incidence of key adverse events by stratum

**eTable 5.** Incidence of low SP, abnormal renal parameters and angioedema at any time postbaseling by stratum

**eFigure.** Effect of sacubitril-valsartan and background-medication based individualized comparator on 6MWD in various predefined subgroups

This supplemental material has been provided by the authors to give readers additional information about their work.

## Online only Supplementary Appendix

This appendix has been provided by the authors to give readers additional information about their work.

Supplement to: Pieske B, et al. Effect of sacubitril/valsartan versus standard medical therapies on plasma NT-proBNP concentration and sub-maximal exercise capacity in patients with heart failure and preserved ejection fraction: The PARALLAX randomized clinical trial

### Index of Contents

|                                                                                                                                                |    |
|------------------------------------------------------------------------------------------------------------------------------------------------|----|
| 1. PARALLAX Committees                                                                                                                         | 2  |
| 2. Independent Statistician                                                                                                                    | 3  |
| 3. PARALLAX Investigators                                                                                                                      | 4  |
| 4. eTable 1: Key eligibility criteria                                                                                                          | 7  |
| 5. eTable 2: Secondary endpoint changes at Week 24 by stratum                                                                                  | 8  |
| 6. eTable 3: Incidence of death, key serious AEs and AEs (safety set*)                                                                         | 9  |
| 7. eTable 4: Incidence of key adverse events by stratum                                                                                        | 11 |
| 8. eTable 5: Incidence of low SBP, abnormal renal parameters and angioedema at any time post-baseline, by stratum                              | 12 |
| 9. eFigure : Effect of sacubitril/valsartan and background-medication based individualized comparator on 6MWD in various pre-defined subgroups | 13 |

## **1. PARALLAX Committees**

**Steering/Executive Committee:** Burkert Pieske (EC Chair), Rolf Wachter, Martin R. Cowie, Sanjiv J. Shah.

**Data Monitoring Committee:** Henry Dargie (Chair), Western Infirmary, Glasgow, Scotland, U.K.; Michel Komajda, Goupe Hospitalier PitieSalpetriere Institut De Cardiologie, Paris, France; Robert Foley, Chronic Disease Research Group Minneapolis, Minnesota, U.S.; Gary Francis, University of Minnesota, Minnesota, U.S.; Stuart Pocock, London School of Hygiene and Tropical Medicine, London, U.K.

**Angioedema Adjudication Committee:** Allen P. Kaplan (Chair), Medical University of South Carolina, Charleston, South Carolina, U.S.; Nancy Brown, Vanderbilt School of Medicine, Nashville, Tennessee, U.S.; Bruce Zuraw, University of California, San Diego, California, U.S.; Paula J Busse, Division of Clinical Immunology, The Mount Sinai School of Medicine, New York, U.S.

## **2. Independent Statistician**

Abigail Baldrige, Bluhm Cardiovascular Institute, Northwestern University Feinberg School of Medicine,  
Chicago, IL, USA

### 3. PARALLAX Investigators

#### Argentina

1. A.C. Prado,
2. L.M.M. Wenez,
3. D.G. Brasca,
4. J.P. Albisu,
5. A.A. Fernandez,
6. A. Liberman,
7. M. Barrionuevo,
8. J.H. Resk, G. Mercau, R.L. de la Fuente, H. Avaca, C. Poy, M. A. Hominal, G. Cursack, O.A. Vogelmann, M.M. Casas, M. Costantino, J. Chiriffe.

#### Austria

1. R. Zweiker,
2. L.J. Motloch,
3. J. Auer,
4. P. Siostrzonek,
5. W. Grander.

#### Belgium

D. Derthoo, W. Mullens, H. Vandekerckhove, R. Maamar, M. Delforge, T. Mulleners.

#### Brazil

S. Rassi, A.P.M. Kormann, A. Moraes, E.R.F. Manenti, G. Reis, L.N. Maia, M.V. Simoes, R.P. Silva, L.C. Danzmann, J.F.K. Saraiva, M.C.V.B.B. Sternieri, W.S.B. de Souza, E.L. Figueiredo.

#### Bulgaria

M.L. Tzekova, B. Boeva, D. Vasilev, S.T.T. Gospodinova, M.H. Milanova, V.M. Kabakchieva, P.I. Valchanova, B. Dimov, P. Petrovsky, P.G. Georgiev, N. Spasova, G. Mazhdakov, M. Konteva, H.O. Benov, S.V. Denchev.

#### Canada

M.C. Parent, C. Demers, D. Dion, R.L. Bourgeois, M.L. Heffernan.

#### Colombia

G.A.M. Silgado, F. Quiroz, A. Cadena, J.L.A. Mendoza, C. Saldarriaga, C. Arana.

#### Czech Republic

L. Nechvatal, K. Linhartova, Z. Klimsa, D. Marek, J. Slaby, R. Polasek, P. Koleckar, J. Carda, M. Kaislerova, P. Trestik, P. Zajicek, J. Kuchar, J. Vondrak, J. Krupicka, T. Brychta, P. Lang.

#### Denmark

H. Rickers, J.D. Hove, I. Gustafsson, O.W. Nielsen.

#### Estonia

T. Ueetoa, S. Noodla, A. Rosenthal, R. Vettus.

#### France

L. Fauchier, V. Aboians, T. M. Dutoiu, E. Decoulx, G. De Geeter, P. Khanoyan, E. Donal, Y. Rosamel, E. Berthelot, M.F. Seronde.

#### Germany

B.R. Winkelmann, W. Grosskopf, J. Haas, B. Schmitt, N. Jahnke, A. Wilke, G. Simonis, P. Bosiljanoff, N. Proskynitopoulos, C. Axthelm, I. Schenkenberger, F. Proepper, N. Frey, F. Edelmann, C. Fehtrup, T. Graf,

M. Seidel, W. Fehske, M. Prohaska, B. Unsoeld, C. Birner, W. Jungmair, A. Hoelscher, C. Kadel, K. Lahiri, H. Mehling, A. Hagenow, I.F.K. Naudts, J. Winkler, P. Salbach, R. Naumann, H. Killat, D. Bastian, A.T. Baeumer, B. Goldmann, A. Cuneo, F. Hoepfner, M. Noutsias, J. Beermann, W. Rieker, D. Buckert, J. Woehrle, J. Westphal, T. Bekfani, S. Stoerk, S. Schnupp, R. Stoehring, T. Neumann, M. Knapp, J. Bourgeois, K. Edel, H.E. Sarnighausen, T. Nitschke, M. Jeserich, H. Ebelt, A. Linke, R. Gaub, T. Sueselbeck, M. Stratmann, N. Toursarkissian, I. Steinebach, F. Krackhardt, R. Schueler, M. Brandt, J. Placke, V. Stangl, D. Tschoepe, U. Overhoff, G. Stenzel, C. Stellbrink, M. Schwefer, E. Lorenz, P. Uebel, D. Gluesing, M. Weissbrodt, F. John.

#### **Guatemala**

J.L. Arango, J.M. Castellanos, C. Chang, F. Haase, E.M. Lopez, A. Ovando, V. Paniagua, M. Vogel, M.A.R. Estrada, I. Rodriguez, V. Corona.

#### **Hungary**

J. Takacs, A. Varga, N. Nyolczas, A. Kalina, A.C. Nagy, B. Merkely.

#### **India**

A. Mehta, M.B. Chopada, N.K. Ghaisas, R. Sethi, D. Basavanna, T. Devasia, D.K. Agarwal, N.C. Bhalani, U.G. Shah, B.B. Chanana, S.N. Washimkar.

#### **Israel**

T. Bental, S. Goland, Z. Azzam, J.M. Weinstein, E. Magen, T.B. Gal.

#### **Italy**

A. Fucili, R.F.E. Pedretti, S. De Servi, B. Baronio, E. Gronda, M. Barbagallo, A. Margonato, F. Cosmi, C. Giannattasio, D. Pavan, A. Mazza, E. Ramazzina, M. Senni, C.A. Inserra, G. Argiolas, C. Borghi.

#### **Latvia**

I. Sime, I. Veze, L. Mora, N. Pontaga.

#### **Lithuania**

J. Plisiene, J. Celutkiene, L. Cepinskiene.

#### **Mexico**

J.L.A. Leon, S. Leon, F. Padilla, R.C. Cerda.

#### **Netherlands**

G. Linssen, A. Jansen, W. Hermans, L. Bellersen, P.V. der Meer, D.J.A. Lok, M. Olimulder, J.M.C. van Hal, R. Troquay, M. de Bie, L. van Heerebeek.

#### **Peru**

R.M.C. Flores, L.A. Camacho, A. Rodriguez, W. Alarco, L.I. Lu, J.J.A.L. Osores, W. Cabrera.

#### **Portugal**

A. Gaspar, J. Martins, P. Sarmiento, C. Fonseca, D. Brito, I. Marques, S. Leao, A. Nascimento, A. Andrade.

#### **Romania**

N.C. Nica, G.V. Ciobotaru, S.I. Coman, I. Copaci, A. Dumitrascu, L. Iosipescu, R. Jurcut, C. Militaru, C. Podoleanu, G. Stanciulescu, M.C. Tomescu, M. Tudoran, O.C. Voicu, A. Giuca, C.D. Mercea, I. Teodorescu.

#### **Russia**

Y.G. Shvarts, L.I. Gapon, N.V. Izmozherova, L.A. Khaisheva, V.P. Nosov, M.E. Mozheiko, E.A. Shutemova, D.V. Privalov, A. Baglikov, A.A. Kastanayan, Z. Kobalava, N.A. Koziolova, D.D. Zotov, A.

Lipchenko, N.N. Burova, N. Polezhaeva, I. Pavlova, L.G. Ermoshkina, K.N. Zrazhevsky, S.A. Boldueva, E.V. Akatova, S.Y. Martsevich.

**Serbia**

S. Apostolovic, S. Boskovic, G. Davidovic, M. Deljanin-Ilic, A. Ilic.

**Slovakia (Slovak Republic)**

A. Dzapina, P. Fulop, T. Jesensky, J. Nociar, A. Predmerska, J. Schichorova, B. Sokolova, J. Lukacova, R. Smik, D. Stofkova, V. Kolikova, J. Papincak, L. Sabo, L. Urgeova, V. Macek, A. Klabnik, P. Letavay, L. Prochazka, D. Vinanska, I. Majercak.

**Spain**

A.R. Dominguez, J.M.G. Pinilla, M.G. Lama, J.N. Villota, L.A. Bonet, J.R.B. Freire, G.P. Perez, D.P. Figal, F.W. Diz, A.G. Quintana, J.D. Fernandez, J.G. Cerezo, J.B. Encinar, F.G. Delgado, P.L. Iborra, F.J.C. Jurad, J. Seller.

**Thailand**

S. Kiatchosakun, S. Chirakarnjanakorn, N. Sansanayudh, S. Srimahachota, T. Thongsri, W. Mahavanakul.

**Turkey**

T. Sahin, Z. Yigit, M. Melek, M. Akin, Y. Cavusoglu, M. Koc, I.T. Ozcan, O.O. Turgut, M.B. Yilmaz, H. Altay, H. Muderrisoglu, O. Badak, T. Tekten, A. Oguzhan, M. Kucuk.

**United Kingdom**

S. Mahmood, M.J. Dewhurst, N.J. Asamoah-Owusu, P. Clifford, A. Takhar, C. Hayes, A. Moriarty, K. Witte, J. Cooke.

**United States**

D. Haas, E. Portnay, S. Feitell, C.S. Brown, B. Hattler, P. Fail, T. Haddad, B. Rama, N. Kapoor, S. Aslam, M. Peters, E. Sanchez, S. Vijayasekaran, S.D. Lupovitch, O. Jonsson, C. Schmalfluss, A. Jain, G. Mentzer, N. Lepor, J. Mignone, W. Drummond, J. Soverow, H. Gaggin, R.I. Garver, M. Martinez-Castrillon, N. Jaffrani, B.D. Harris, M. Bernstein, B.C. Sizemore, T. Wells, A.C. Schwartz, M. Alhaddad, A. White.

**eTable 1: Key eligibility criteria**

| <b>Key inclusion criteria</b>                                                                                                                                                                                                                                                                                                                                                                                                                                                                                                                                                                                                                                                                                                                                                                                                                                                                                                                                                                                                                                                                                                                                                                                                                                                                                                                                                                                                                                                                                                                                                                                                                                                                                                                                                                                                                         |
|-------------------------------------------------------------------------------------------------------------------------------------------------------------------------------------------------------------------------------------------------------------------------------------------------------------------------------------------------------------------------------------------------------------------------------------------------------------------------------------------------------------------------------------------------------------------------------------------------------------------------------------------------------------------------------------------------------------------------------------------------------------------------------------------------------------------------------------------------------------------------------------------------------------------------------------------------------------------------------------------------------------------------------------------------------------------------------------------------------------------------------------------------------------------------------------------------------------------------------------------------------------------------------------------------------------------------------------------------------------------------------------------------------------------------------------------------------------------------------------------------------------------------------------------------------------------------------------------------------------------------------------------------------------------------------------------------------------------------------------------------------------------------------------------------------------------------------------------------------|
| <ul style="list-style-type: none"><li>• ≥ 45 years of age, any sex</li><li>• LVEF &gt; 40% by echocardiography performed within 6 months prior to screening or during screening</li><li>• Symptom(s) of HF (NYHA class II-IV) requiring treatment with diuretics (including loop, or thiazide diuretics, or MRAs) for at least 30 days prior to screening</li><li>• Structural heart disease demonstrated by echocardiographic evidence of LAE or LVH: (any local measurement made during the screening or within the 6 months prior to screening):<ul style="list-style-type: none"><li>○ LAE defined by at least one of the following: LA width (diameter) ≥ 3.8 cm or LA length ≥ 5.0 cm or LA area ≥ 20 cm<sup>2</sup> or LA volume ≥ 55 mL or LA volume index ≥ 29 mL/m<sup>2</sup></li><li>○ LVH defined by septal thickness or posterior wall thickness ≥ 1.1 cm</li></ul></li><li>• Receiving evidence-based therapy for relevant comorbidities as determined by the individual clinical profile of the patient (e.g. age and number and type of comorbidities) with stable doses for the previous four weeks prior to randomization</li><li>• NT-proBNP &gt;220 pg/mL for patients with sinus rhythm or &gt;600 pg/mL for patients with AF on the screening ECG</li><li>• KCCQ clinical summary score &lt;75 at Visit 1</li><li>• Patients on ACEI or ARB therapy must have had a history of hypertension</li></ul>                                                                                                                                                                                                                                                                                                                                                                                                                          |
| <b>Key exclusion criteria</b>                                                                                                                                                                                                                                                                                                                                                                                                                                                                                                                                                                                                                                                                                                                                                                                                                                                                                                                                                                                                                                                                                                                                                                                                                                                                                                                                                                                                                                                                                                                                                                                                                                                                                                                                                                                                                         |
| <ul style="list-style-type: none"><li>• Any prior echocardiographic measurement of LVEF ≤40%, under stable conditions</li><li>• Acute decompensated HF within 30 days prior to screening</li><li>• Acute coronary syndrome (including myocardial infarction), cardiac surgery, other major cardiovascular surgery, or urgent percutaneous coronary intervention within 3 months prior to screening</li><li>• Any clinical event within the 6 months prior to screening that could have reduced the LVEF, unless an echo measurement was performed after the event confirming the LVEF to be &gt;40%</li><li>• Current (within 30 days from Visit 1) use of renin inhibitor(s), dual RAS blockade, or sacubitril/valsartan</li><li>• Walk distance primarily limited by non-cardiac conditions at Visit 1</li><li>• Probable alternative diagnoses that could account for the HF symptoms, specifically severe pulmonary disease; anemia (Hb &lt;10 g/dL in males, &lt;9.5 g/dL in females); BMI &gt;40kg/m<sup>2</sup></li><li>• Hemodynamically relevant valvular disease; clinically significant congenital heart disease; pericardial constriction; genetic or infiltrative cardiomyopathy</li><li>• Prior history of any dilated cardiomyopathy, including peripartum cardiomyopathy, chemotherapy-induced cardiomyopathy, or viral myocarditis</li><li>• Patients with HbA1c &gt;7.5%, not treated for diabetes</li><li>• SBP &lt;110 mmHg or ≥180 mmHg at screening or SBP &gt;150 to &lt;180 mmHg at screening unless the patient is receiving three or more antihypertensive drugs</li><li>• Serum potassium &gt;5.2 mmol/L (or equivalent plasma potassium value) at screening</li><li>• eGFR &lt;30 mL/min/1.73 m<sup>2</sup> at screening</li><li>• History of angioedema or history of hypersensitivity to sacubitril/valsartan</li></ul> |

ACEI, angiotensin converting enzyme inhibitor; ARB, angiotensin receptor blocker; eGFR, estimated glomerular filtration rate; Hb, hemoglobin; HbA1c, glycated hemoglobin; HF, heart failure; KCCQ, Kansas City Cardiomyopathy Questionnaire; LA, left atrium; LAE, left atrial enlargement; LVEF, left ventricular ejection fraction; LVH, left ventricular hypertrophy; MRA, mineralocorticoid receptor antagonist; NT-proBNP, N-terminal pro B-type natriuretic peptide; NYHA, New York Heart Association; SBP, systolic blood pressure; RAS, renin-angiotensin system



**eTable 2: Secondary endpoint changes at Week 24 by stratum**

|                                                                                     | ACEI stratum         |                  | ARB stratum          |                   | No RASi stratum      |                  |
|-------------------------------------------------------------------------------------|----------------------|------------------|----------------------|-------------------|----------------------|------------------|
|                                                                                     | Sacubitril/valsartan | Enalapril        | Sacubitril/valsartan | Valsartan         | Sacubitril/valsartan | Placebo          |
| <b>Change from baseline in KCCQ clinical summary score at Week 24<sup>a,b</sup></b> |                      |                  |                      |                   |                      |                  |
| n                                                                                   | 510                  | 506              | 546                  | 557               | 151                  | 147              |
| <b>Adjusted mean change from baseline (95% CI)</b>                                  | 11.2 (9.7, 12.8)     | 10.8 (9.3, 12.4) | 14.2 (12.7, 15.7)    | 12.6 (11.1, 14.1) | 9.6 (6.5, 12.7)      | 12.5 (9.4, 15.7) |
| Adjusted mean difference (95% CI)                                                   | 0.4 (-1.8, 2.6)      |                  | 1.6 (-0.6, 3.7)      |                   | -2.9 (-7.4, 1.5)     |                  |
| ≥5 points improvement, n (%)                                                        | 348 (68.2%)          | 325 (64.2%)      | 383 (70.2%)          | 373 (67.0)        | 89 (58.9)            | 97 (66.0)        |
| <b>Adjusted odds ratio<sup>c</sup> (95% CI)</b>                                     | 1.29 (0.83, 2.02)    |                  | 1.15 (0.74, 1.76)    |                   | 0.62 (0.28, 1.38)    |                  |
| ≥5 points deterioration, n (%)                                                      | 77 (15.1)            | 88 (17.4)        | 71 (13.0)            | 90 (16.2)         | 39 (25.8)            | 24 (16.3)        |
| <b>Adjusted odds ratio<sup>c</sup> (95% CI)</b>                                     | 0.83 (0.49, 1.38)    |                  | 0.73 (0.44, 1.21)    |                   | 2.01 (0.84, 4.82)    |                  |
| <b>Change from baseline in NYHA class at Week 24<sup>a,b*</sup></b>                 |                      |                  |                      |                   |                      |                  |
| n                                                                                   | 518                  | 511              | 557                  | 567               | 153                  | 151              |
| Improved, n (%)                                                                     | 98 (18.9%)           | 118 (23.1%)      | 146 (26.2%)          | 138(24.3%)        | 46 (30.1%)           | 39(25.8%)        |
| Worsened, n (%)                                                                     | 21(4.1%)             | 18 (3.5%)        | 19 (3.4%)            | 28(4.9%)          | 11(7.2%)             | 7(4.6%)          |
| <b>Adjusted odds ratio to be in favorable NYHA class (95% CI)</b>                   | 0.7 (0.5, 1.0)       |                  | 1.2 (0.9, 1.5)       |                   | 1.2 (0.7, 1.9)       |                  |

All comparisons are sacubitril/valsartan vs. background medication based individualized comparator

<sup>a</sup>The MMRM model includes stratum (ACEI, ARB, No RASi), region, treatment (sacubitril/valsartan and background medication based individualized comparator), visit, and treatment-by-visit as fixed-effect factors; baseline values, baseline SBP, stratum-by-baseline value, stratum-by-baseline SBP, and visit-by-baseline value interactions as covariates.

<sup>b</sup>An adjusted mean difference > 0 favors sacubitril/valsartan.

<sup>c</sup>An adjusted odds ratio > 1 favors sacubitril/valsartan.

n = number of patients with NYHA improved/worsened from baseline at the visit.

ACEI, angiotensin converting enzyme inhibitor; ARB, angiotensin receptor blocker; CI, confidence interval; KCCQ CSS, Kansas City Cardiomyopathy Questionnaire clinical summary score; NYHA, New York Heart Association; RASi, renin-angiotensin system inhibitor; SBP, systolic blood pressure

**eTable 3: Incidence of death, key serious AEs and AEs (safety set<sup>a</sup>)**

|                                                                                           | <b>Sacubitril/valsartan<br/>N=1280</b> | <b>Background-<br/>medication based<br/>individualized<br/>comparator<br/>N=1284</b> |
|-------------------------------------------------------------------------------------------|----------------------------------------|--------------------------------------------------------------------------------------|
| <b>Death, n (%)</b>                                                                       | 23 (1.8%)                              | 17 (1.3%)                                                                            |
| <b>Serious adverse events, n (%)</b>                                                      |                                        |                                                                                      |
| At least one serious AE                                                                   | 186 (14.5%)                            | 191 (14.9%)                                                                          |
| At least one suspected study drug related serious AE                                      | 11 (0.9%)                              | 10 (0.8%)                                                                            |
| <b>Adverse events, n (%)</b>                                                              |                                        |                                                                                      |
| At least one AE                                                                           | 1087 (84.9%)                           | 1030 (80.2%)                                                                         |
| At least one suspected study drug related AE                                              | 390 (30.5%)                            | 290 (22.6%)                                                                          |
| At least one AE leading to permanent discontinuation of study treatment                   | 116 (9.0%)                             | 87 (6.8%)                                                                            |
| At least one AE leading to dose adjustment or temporarily interruption of study treatment | 248 (19.4%)                            | 186 (14.5%)                                                                          |
| <b>Key adverse events, n (%)</b>                                                          |                                        |                                                                                      |
| Hypotension                                                                               | 180 (14.1%)                            | 70 (5.5%)                                                                            |
| Hypotension with SBP <100 mmHg                                                            | 75 (5.9%)                              | 21 (1.6%)                                                                            |
| Urine albumin/creatinine ratio increased                                                  | 157 (12.3%)                            | 97 (7.6%)                                                                            |
| Hyperkalemia                                                                              | 149 (11.6%)                            | 140 (10.9%)                                                                          |
| Renal impairment                                                                          | 149 (11.6%)                            | 110 (8.6%)                                                                           |
| Hematuria                                                                                 | 145 (11.3%)                            | 105 (8.2%)                                                                           |
| Glomerular filtration rate decreased                                                      | 137 (10.7%)                            | 150 (11.7%)                                                                          |
| Proteinuria                                                                               | 121 (9.5%)                             | 84 (6.5%)                                                                            |
| Dizziness                                                                                 | 70 (5.5%)                              | 63 (4.9%)                                                                            |
| Urinary protein/creatinine ratio increased                                                | 66 (5.2%)                              | 65 (5.1%)                                                                            |
| Cardiac failure                                                                           | 54 (4.2%)                              | 69 (5.4%)                                                                            |
| Hypertension                                                                              | 42 (3.3%)                              | 81 (6.3%)                                                                            |
| Angioedema <sup>b</sup>                                                                   | 4 (0.3%)                               | 3 (0.2%)                                                                             |
| <b>Serum creatinine increase, n/N (%)</b>                                                 |                                        |                                                                                      |
| >50% increase                                                                             | 88/1270 (6.9%)                         | 92/1271 (7.2%)                                                                       |
| >0.5 mg/dL                                                                                | 100/1270 (7.9%)                        | 113/1271 (8.9%)                                                                      |
| >2.0 mg/dL,                                                                               | 87/1271 (6.9%)                         | 73/1271 (5.7%)                                                                       |
| >2.5 mg/dL                                                                                | 20/1271 (1.6%)                         | 21/1271 (1.7%)                                                                       |
| >3.0 mg/dL                                                                                | 4/1271 (0.3%)                          | 3/1271 (0.2%)                                                                        |
| <b>eGFR decrease(mL/min/1.73m<sup>2</sup>), n/N (%)</b>                                   |                                        |                                                                                      |
| >25% decrease                                                                             | 304/1270 (23.9%)                       | 295/1271 (23.2%)                                                                     |
| >40% decrease                                                                             | 69/1270 (5.4%)                         | 76/1271 (6.0%)                                                                       |
| >50% decrease                                                                             | 19/1270 (1.5%)                         | 33/1271 (2.6%)                                                                       |
| >30 mL/min/1.73m <sup>2</sup> decrease                                                    | 45/1270 (3.5%)                         | 61/1271 (4.8%)                                                                       |
| >60 mL/min/1.73m <sup>2</sup> decrease                                                    | 4/1270 (0.3%)                          | 5/1271 (0.4%)                                                                        |
| <b>Serum potassium, n/N (%)</b>                                                           |                                        |                                                                                      |

|                               |                  |                  |
|-------------------------------|------------------|------------------|
| ≥5.5 mmol/L                   | 230/1271 (18.1%) | 203/1270 (16.0%) |
| >6.0 mmol/L                   | 32/1271 (2.5%)   | 27/1271 (2.1%)   |
| >6.5 mmol/L                   | 9/1271 (0.7%)    | 7/1271 (0.6%)    |
| <b>Key serious AEs, n (%)</b> |                  |                  |
| Cardiac disorders             | 70 (5.5%)        | 94 (7.3%)        |
| Cardiac failure               | 21 (1.6%)        | 31 (2.4%)        |
| Atrial fibrillation           | 13 (1.0%)        | 17 (1.3%)        |
| Angina pectoris               | 8 (0.6%)         | 8 (0.6%)         |
| Angina unstable               | 6 (0.5%)         | 7 (0.6%)         |
| Infections and infestations   | 39 (3.0%)        | 32 (2.5%)        |
| Renal and urinary disorders   | 10 (0.8%)        | 12 (0.9%)        |

<sup>a</sup>The safety set includes all randomized patients who received at least one dose of study drug. Patients were analyzed according to the treatment actually received

<sup>b</sup>Includes patients with adjudication confirmed angioedema events

A patient with multiple adverse events within one category is counted only once in the category  
MedDRA version 22.1 was used for reporting of AEs

AE, adverse event; eGFR, estimated glomerular filtration rate; SBP, systolic blood pressure

**eTable 4: Incidence of key adverse events by stratum**

|                                                                               | ACEI stratum                        |                      | ARB stratum                         |                      | No RASi stratum                     |                    |
|-------------------------------------------------------------------------------|-------------------------------------|----------------------|-------------------------------------|----------------------|-------------------------------------|--------------------|
|                                                                               | Sacubitril/<br>valsartan<br>(N=532) | Enalapril<br>(N=533) | Sacubitril/<br>valsartan<br>(N=586) | Valsartan<br>(N=588) | Sacubitril/<br>valsartan<br>(N=162) | Placebo<br>(N=163) |
| <b>Serious adverse events, n (%)</b>                                          |                                     |                      |                                     |                      |                                     |                    |
| Death                                                                         | 14 (2.6%)                           | 5 (0.9%)             | 6 (1.0%)                            | 10 (1.7%)            | 3 (1.9%)                            | 2 (1.2%)           |
| At least one serious AE                                                       | 80 (15%)                            | 77 (14.5%)           | 78 (13.3%)                          | 87 (14.8%)           | 28 (17.3%)                          | 27 (16.6%)         |
| At least one suspected study drug related serious AE                          | 4 (0.8%)                            | 2 (0.4%)             | 3 (0.5%)                            | 7 (1.2%)             | 4 (2.5%)                            | 1 (0.6%)           |
| Cardiac failure                                                               | 10 (1.9%)                           | 12 (2.3%)            | 8 (1.4%)                            | 13 (2.2%)            | 3 (1.9%)                            | 6 (3.7%)           |
| Atrial fibrillation                                                           | 7 (1.3%)                            | 6 (1.1%)             | 3 (0.5%)                            | 9 (1.5%)             | 3 (1.9%)                            | 2 (1.2%)           |
| Angina pectoris                                                               | 3 (0.6)                             | 3 (0.6)              | 3 (0.5)                             | 5 (0.9)              | 2 (1.2)                             | 0                  |
| <b>Adverse events, n (%)</b>                                                  |                                     |                      |                                     |                      |                                     |                    |
| At least one AE                                                               | 439 (82.5%)                         | 420 (78.8%)          | 499 (85.2%)                         | 478 (81.3%)          | 149 (92.0%)                         | 132 (81.0%)        |
| At least one suspected study drug related AE                                  | 158 (29.7%)                         | 126 (23.6%)          | 163 (27.8%)                         | 137 (23.3%)          | 69 (42.6%)                          | 27 (16.6%)         |
| At least one AE leading to permanent discontinuation of study treatment       | 48 (9.0%)                           | 41 (7.7%)            | 47 (8.0%)                           | 43 (7.3%)            | 26 (16.1%)                          | 9 (5.5%)           |
| AE leading to dose adjustment or temporary discontinuation of study treatment | 102 (19.2%)                         | 72 (13.5%)           | 97 (16.6%)                          | 92 (15.7%)           | 49 (30.3%)                          | 22 (13.5%)         |
| <b>Most common treatment emergent AEs, n (%)</b>                              |                                     |                      |                                     |                      |                                     |                    |
| Hypotension                                                                   | 69 (13.0%)                          | 31 (5.8%)            | 74 (12.6%)                          | 32 (5.4%)            | 37 (22.8%)                          | 7 (4.3%)           |
| UACR increased                                                                | 65 (12.2%)                          | 45 (8.4%)            | 81 (13.8%)                          | 46 (7.8%)            | 11 (6.8%)                           | 6 (3.7%)           |
| Hyperkalemia                                                                  | 64 (12.0%)                          | 64 (12.0%)           | 62 (10.6%)                          | 64 (10.9%)           | 23 (14.2%)                          | 12 (7.4%)          |
| Renal impairment                                                              | 61 (11.5%)                          | 50 (9.4%)            | 61 (10.4%)                          | 49 (8.3%)            | 27 (16.7%)                          | 11 (6.8%)          |
| Hematuria                                                                     | 65 (12.2%)                          | 42 (7.9%)            | 69 (11.8%)                          | 49 (8.3%)            | 11 (6.8%)                           | 14 (8.6%)          |
| Proteinuria                                                                   | 49 (9.2%)                           | 38 (7.1%)            | 62 (10.6%)                          | 38 (6.5%)            | 10 (6.2%)                           | 8 (4.9%)           |
| Dizziness                                                                     | 22 (4.1%)                           | 22 (4.1%)            | 36 (6.1%)                           | 30 (5.1%)            | 12 (7.4%)                           | 11 (6.8%)          |
| UPCR increased                                                                | 27 (5.1%)                           | 24 (4.5%)            | 29 (5.0%)                           | 35 (6.0%)            | 10 (6.2%)                           | 6 (3.7%)           |
| Cardiac failure                                                               | 21 (4.0%)                           | 25 (4.7%)            | 22 (3.8%)                           | 31 (5.3%)            | 11 (6.8%)                           | 13 (8.0%)          |

A patient with multiple adverse events within one category is counted only once in the category

MedDRA version 22.1 was used for reporting of AEs

ACEI, angiotensin converting enzyme inhibitor; AE, adverse event; ARB, angiotensin receptor blocker; RASi, renin-angiotensin system inhibitor; UACR, urinary albumin creatinine ratio; UPCR, urinary protein creatinine ratio

**eTable 5: Incidence of low SBP, abnormal renal parameters and angioedema at any time post baseline, by stratum**

|                                                   | ACEI stratum                 |                   | ARB stratum                  |                   | No RASi stratum              |                 |
|---------------------------------------------------|------------------------------|-------------------|------------------------------|-------------------|------------------------------|-----------------|
|                                                   | Sacubitril/valsartan (N=532) | Enalapril (N=533) | Sacubitril/valsartan (N=586) | Valsartan (N=588) | Sacubitril/valsartan (N=162) | Placebo (N=163) |
| <b>Reductions in SBP, n (%)</b>                   |                              |                   |                              |                   |                              |                 |
| SBP <100 mmHg                                     | 78/527 (14.8%)               | 29/531 (5.5%)     | 79/583 (13.6%)               | 46/585 (7.9%)     | 46/160 (28.8%)               | 101/161 (6.2%)  |
| SBP <100 mmHg and ≥30 mmHg decrease from baseline | 37/527 (7.0%)                | 15/531 (2.8%)     | 35/583 (6.0%)                | 24/585 (4.1%)     | 22/160 (13.8%)               | 4/161 (2.5%)    |
| SBP <90 mmHg and >20 mmHg decrease from baseline  | 13/527 (2.5%)                | 3/531 (0.6%)      | 7/583 (1.2%)                 | 6/585 (1.0%)      | 11/160 (6.9%)                | 2/161 (1.2%)    |
| <b>Serum creatinine increase, n (%)</b>           |                              |                   |                              |                   |                              |                 |
| >50% increase                                     | 43/527 (8.2%)                | 41/529 (7.8%)     | 29/583 (5.0%)                | 42/583 (7.2%)     | 16/160 (10.0%)               | 9/159 (5.7%)    |
| >0.5 mg/dL                                        | 45/527 (8.5%)                | 50/529 (9.5%)     | 36/583 (6.2%)                | 53/583 (9.1%)     | 19/160 (11.9%)               | 10/159 (6.3%)   |
| >2.0 mg/dL                                        | 41/528 (7.8%)                | 30/529 (5.7%)     | 31/583 (5.3%)                | 37/583 (6.4%)     | 15/160 (9.4%)                | 6/159 (3.8%)    |
| >2.5 mg/dL                                        | 9/528 (1.7%)                 | 7/529 (1.3%)      | 8/583 (1.4%)                 | 11/583 (1.9%)     | 3/160 (1.9%)                 | 3/159 (1.9%)    |
| >3.0 mg/dL                                        | 2/528 (0.4%)                 | 1/529 (0.2%)      | 2/583 (0.3%)                 | 2/583 (0.3%)      | 0 (0.0%)                     | 0 (0.0%)        |
| <b>Serum potassium, n (%)</b>                     |                              |                   |                              |                   |                              |                 |
| ≥5.5 mmol/L                                       | 106/528 (20.1%)              | 102/529 (19.3%)   | 87/583 (14.9%)               | 84/583 (14.4%)    | 37/160 (23.1%)               | 17/159 (10.7%)  |
| >6.0 mmol/L                                       | 14/528 (2.7%)                | 8/529 (1.5%)      | 12/583 (2.1%)                | 14/583 (2.4%)     | 6/160 (3.8%)                 | 5/159 (3.14%)   |
| >6.5 mmol/L                                       | 3/528 (0.6%)                 | 2/529 (0.4%)      | 4/583 (0.7%)                 | 4/583 (0.7%)      | 2/160 (1.3%)                 | 1/159 (0.63%)   |
| <b>eGFR decrease n (%)</b>                        |                              |                   |                              |                   |                              |                 |
| >25%                                              | 138/527 (26.2%)              | 136/529 (25.7%)   | 118/583 (20.2%)              | 138/583 (23.7%)   | 48/160 (30.0%)               | 21/159 (13.2%)  |
| >40%                                              | 35/527 (6.6%)                | 33/529 (6.2%)     | 22/583 (3.8%)                | 35/583 (6.0%)     | 12/160 (7.5%)                | 8/159 (5.0%)    |
| >50%                                              | 12/527 (2.3%)                | 13/529 (2.5%)     | 6/583 (1.0%)                 | 17/583 (2.9%)     | 1/160 (0.6%)                 | 3/159 (1.9%)    |
| >30 mL/min/1.73 m <sup>2</sup>                    | 28/527 (5.3%)                | 28/529 (5.3%)     | 11/583 (1.9%)                | 30/583 (5.2%)     | 6/160 (3.8%)                 | 3/159 (1.9%)    |
| >60 mL/min/1.73 m <sup>2</sup>                    | 3/527 (0.6%)                 | 1/529 (0.2%)      | 0/583 (0.0%)                 | 4/583 (0.7%)      | 1/160 (0.6%)                 | 0/159 (0.0%)    |
| Angioedema <sup>a</sup> , n (%)                   | 2 (0.4%)                     | 2 (0.4%)          | 1 (0.2%)                     | 0 (0.0%)          | 1 (0.6%)                     | 1 (0.6%)        |

<sup>a</sup>Patients with adjudication confirmed angioedema events

Data are presented as m/n (%) unless otherwise specified

ACEI, angiotensin converting enzyme inhibitor; ARB, angiotensin receptor blocker; eGFR, estimated glomerular filtration rate; RASi, renin-angiotensin system inhibitor; SBP, systolic blood pressure

**eFigure. Effect of sacubitril/valsartan and background-medication based individualized comparator on 6MWD in various pre-defined subgroups**

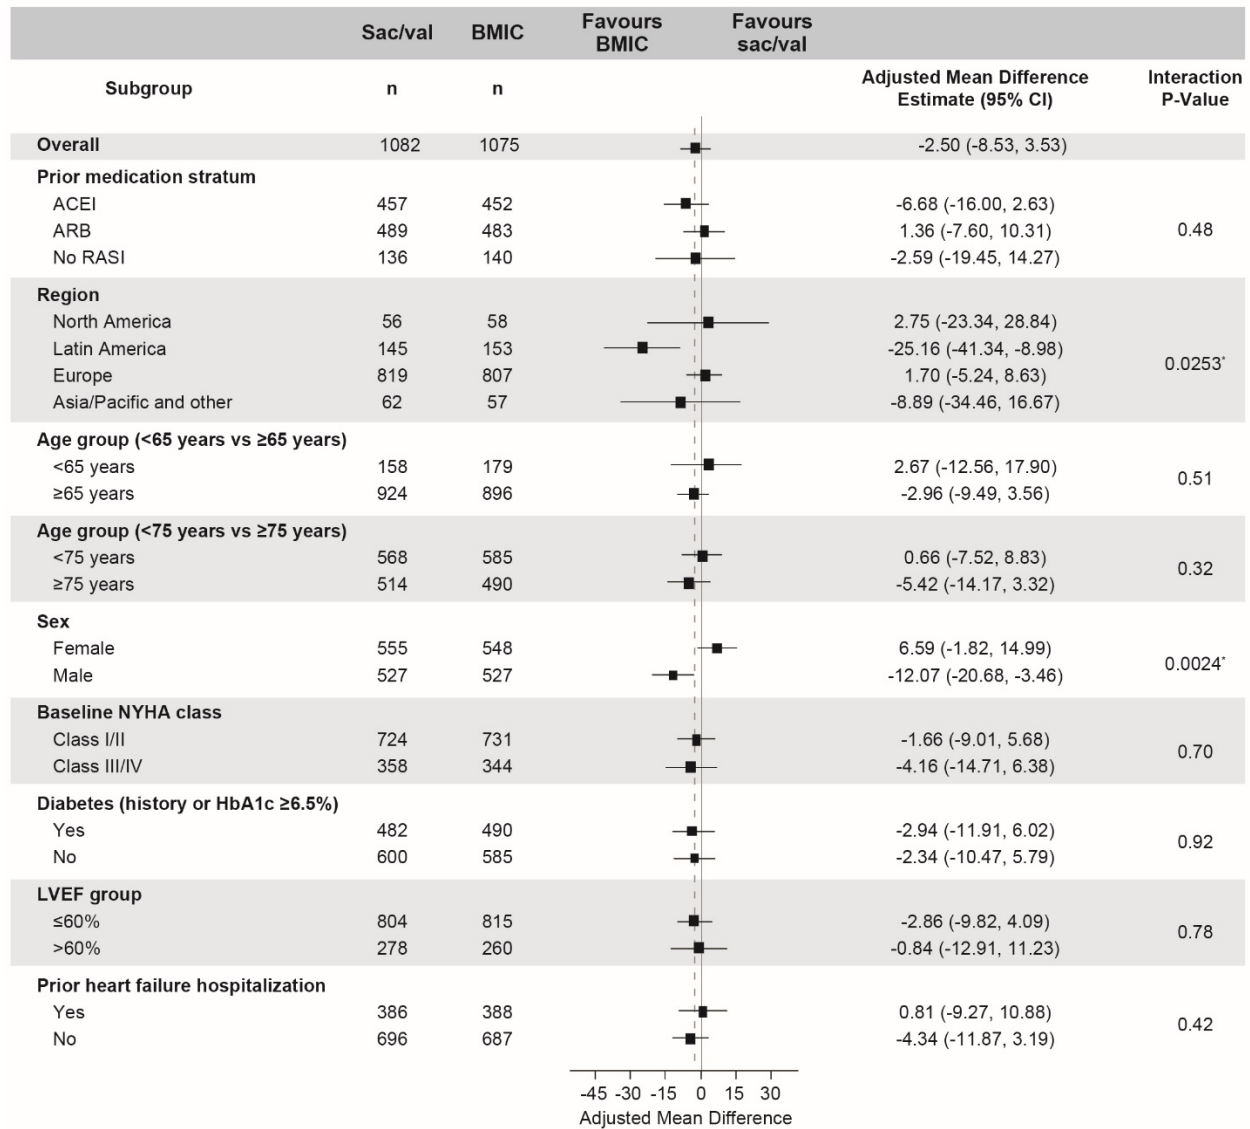

An adjusted mean difference of >0 favors sacubitril/valsartan.

Interaction p-value is for the subgroup-variable-by-treatment interaction at Week 12.

- The MMRM model includes stratum (ACEI, ARB, No RASi), region, treatment (sacubitril/valsartan, background-medication based individualized comparators), visit, treatment-by-visit interaction, sub-group, sub-group-by-visit interaction, treatment-by-sub-group interaction and treatment-by-sub-group-by-visit interaction as fixed-effect factors; baseline 6MWD, baseline SBP, stratum-by-baseline 6MWD, stratum by baseline SBP, and visit-by-baseline 6MWD interactions as covariates; and models the within patient covariance using an unstructured covariance matrix (a common matrix for the two treatment groups).

6MWD, 6 minute walking distance; AGMR, adjusted geometric mean ratio; ACEI, angiotensin converting enzyme inhibitor; ARB, angiotensin receptor blocker; HbA1c, glycated hemoglobin; BMIC, background-medication based individualized comparator; LVEF, left ventricular ejection fraction; NYHA, New York Heart Failure Association; RASi, renin-angiotensin-system inhibitor; sac/val, sacubitril/valsartan; SBP, systolic blood pressure
