# Supplementary material
Source: PubMed Central journal article supplement (PMC8596197)
Supplement: jama-e2118463-s004.pdf [file jama-e2118463-s004.pdf]

## Supplemental Online Content: Nonauthor Collaborators

\*Indicates required information. Only first name, last name, and suffix will appear in PubMed.

| Group Name(s):* PARALLAX Investigators and Committee members |             |                       |                  |                                                         |                                                                                 |                                                         |                                                                                            |
|--------------------------------------------------------------|-------------|-----------------------|------------------|---------------------------------------------------------|---------------------------------------------------------------------------------|---------------------------------------------------------|--------------------------------------------------------------------------------------------|
| First Name and Middle Initial*                               | *Last Name  | *Suffix (eg, Jr, III) | Academic Degrees | Institution                                             | Location (city, state/province, country)                                        | Role or Contribution, eg, chair, principal investigator | Group (if more than 1 Group listed in the byline) and/or Subgroup (eg, Steering Committee) |
| Aldo Carlos                                                  | Prado       |                       |                  | Investigaciones Clinicas Tucuman                        | Bernardo de Monteagudo 524, Tucuman, San Miguel de Tucuman, T4000ICL, Argentina | Principal Investigator                                  | Investigators                                                                              |
| Liza Maria Marcela                                           | Wenetz      |                       |                  | Hospital de Alta Complejidad Juan Domingo Peron Formosa | Av Nestor Kirchner y Av de las Americas, Formosa, P3600, Argentina              | Principal Investigator                                  | Investigators                                                                              |
| Daniela Garcia                                               | Brasca      |                       |                  | Hospital Italiano de Cordoba                            | Roma 550, Cordoba, X5004BAL, Argentina                                          | Principal Investigator                                  | Investigators                                                                              |
| Juan Pablo                                                   | Albisu      |                       |                  | Instituto Cardiovascular de San Luis                    | Rivadavia 1059, San Luis, D5702JRS, Argentina                                   | Principal Investigator                                  | Investigators                                                                              |
| Alberto Alfredo                                              | Fernandez   |                       |                  | Instituto de Investigaciones Clinicas Quilmes           | Sarmiento 315, Quilmes, Buenos Aires, B1878GEG, Argentina                       | Principal Investigator                                  | Investigators                                                                              |
| Alberto                                                      | Liberman    |                       |                  | Instituto de Investigaciones Clinicas Cordoba           | Dean Funes 1161, Cordoba, X5000, Argentina                                      | Principal Investigator                                  | Investigators                                                                              |
| Marcelo                                                      | Barrionuevo |                       |                  | Sanatorio Mayo Privado                                  | Huberto Primo 520, Cordoba, X5000, Argentina                                    | Principal Investigator                                  | Investigators                                                                              |
| Jorge Hector                                                 | Resk        |                       |                  | Centro Medico Privado - Instituto del Corazon           | La Rioja 881, Cordoba, X5000EVQ, Argentina                                      | Principal Investigator                                  | Investigators                                                                              |
| Guillermo                                                    | Mercau      |                       |                  | Centro Modelo de Cardiologia                            | Laprida 554, San Miguel de Tucuman, Tucuman, T4000IFL, Argentina                | Principal Investigator                                  | Investigators                                                                              |
| Ricardo Leon de la                                           | Fuente      |                       |                  | Centro Cardiovascular Salta                             | Mariano Boedo 60, Ciudad de Salta, Provincia de Salta, A4406BPF, Argentina      | Principal Investigator                                  |                                                                                            |

## Supplemental Online Content: Nonauthor Collaborators

\*Indicates required information. Only first name, last name, and suffix will appear in PubMed.

| First Name and Middle Initial* | *Last Name | *Suffix (eg, Jr, III) | Academic Degrees | Institution                                                      | Location (city, state/province, country)                                                       | Role or Contribution, eg, chair, principal investigator | Group (if more than 1 Group listed in the byline) and/or Subgroup (eg, Steering Committee) |
|--------------------------------|------------|-----------------------|------------------|------------------------------------------------------------------|------------------------------------------------------------------------------------------------|---------------------------------------------------------|--------------------------------------------------------------------------------------------|
| Horacio                        | Avaca      |                       |                  | Hospital Britanico                                               | Perdriel 74, Caba, Buenos Aires, C1280AEB, Argentina                                           | Principal Investigator                                  | Investigators                                                                              |
| Carlos                         | Poy        |                       |                  | Sanatorio Parque de Rosario                                      | Boulevard Orono 860, Rosario, Santa Fe, S2000DSV, Argentina                                    | Principal Investigator                                  | Investigators                                                                              |
| Miguel Angel                   | Hominal    |                       |                  | Centro de Investigaciones Clinicas del Litoral                   | Av. Rivadavia 3363, Santa Fe, S3000FWO, Argentina                                              | Principal Investigator                                  | Investigators                                                                              |
| Guillermo                      | Cursack    |                       |                  | Consultorios de Especialidades Medicas Esperanza- Sanatorio Espe | Belgrano 2333 Esperanza, Esperanza, Santa Fe, 3080, Argentina                                  | Principal Investigator                                  | Investigators                                                                              |
| Oscar Ariel                    | Vogelmann  |                       |                  | IOT Sanatorio Integral                                           | Bolivar 2376, Posadas, Misiones, N3300AHX, Argentina                                           | Principal Investigator                                  | Investigators                                                                              |
| Marcelo Martin                 | Casas      |                       |                  | Clinica Adventista Belgrano                                      | Estomba 1710, Buenos Aires, C1430EGF, Argentina                                                | Principal Investigator                                  | Investigators                                                                              |
| Marcelo                        | Costantino |                       |                  | Centro Medico Luquez                                             | Sargento Cabral 1385, Cordoba, X5006CBI, Argentina                                             | Principal Investigator                                  | Investigators                                                                              |
| Josefina                       | Chiriffe   |                       |                  | Mutual Portuaria 21 de Diciembre                                 | Yrigoyen 1292 San Lorenzo, Rosario, Santa Fe, 2200, Argentina                                  | Principal Investigator                                  | Investigators                                                                              |
| Robert                         | Zweiker    |                       |                  | Med Univ Klinik Graz                                             | Auenbruggerplatz 15, Graz, Styria, A-8036, Austria                                             | Principal Investigator                                  | Investigators                                                                              |
| Lukas Jaroslaw                 | Motloch    |                       |                  | Uniklinikum Salzburg Landeskrankenhaus                           | Universitaetsklinik fuer Innere Medizin II Muellner Hauptstrasse 48, Salzburg, A-5020, Austria | Principal Investigator                                  | Investigators                                                                              |
| Johann                         | Auer       |                       |                  | A oe Krankenhaus St Josef                                        | Ringstrasse 60, Braunau, Upper Austria, A5280, Austria                                         | Principal Investigator                                  | Investigators                                                                              |

## Supplemental Online Content: Nonauthor Collaborators

\*Indicates required information. Only first name, last name, and suffix will appear in PubMed.

| First Name and Middle Initial* | *Last Name    | *Suffix (eg, Jr, III) | Academic Degrees | Institution                                               | Location (city, state/province, country)                                                                            | Role or Contribution, eg, chair, principal investigator | Group (if more than 1 Group listed in the byline) and/or Subgroup (eg, Steering Committee) |
|--------------------------------|---------------|-----------------------|------------------|-----------------------------------------------------------|---------------------------------------------------------------------------------------------------------------------|---------------------------------------------------------|--------------------------------------------------------------------------------------------|
| Peter                          | Siostrzonek   |                       |                  | Ordenskllinikum Linz Barmherzigen Schwestern              | Seilerstaette 4, Linz, Upper Austria, 4010, Austria                                                                 | Principal Investigator                                  | Investigators                                                                              |
| Wilhelm                        | Grander       |                       |                  | LKH Hall                                                  | Milserstrasse 10, Hall in Tirol, Tyrol, 6060, Austria                                                               | Principal Investigator                                  | Investigators                                                                              |
| David                          | Derthoo       |                       |                  | AZ Groeninge Campus Kennedylaan                           | Route D042 President Kennedylaan 4, Kortrijk, 8500, Belgium                                                         | Principal Investigator                                  | Investigators                                                                              |
| Wilfried                       | Mullens       |                       |                  | Ziekenhuis Oost Limburg Campus St Jan                     | Schiepse Bos 6, Genk, 3600, Belgium                                                                                 | Principal Investigator                                  | Investigators                                                                              |
| Hans                           | Vandekerckhov |                       |                  | AZ Sint Lucas                                             | Groene Briel 1, Gent,                                                                                               | Principal Investigator                                  | Investigators                                                                              |
| Rachid                         | Maamar        |                       |                  | CHR Hutois                                                | Rue des Trois Ponts 2, Huy, 4500, Belgium                                                                           | Principal Investigator                                  | Investigators                                                                              |
| Marc                           | Delforge      |                       |                  | CHR Hutois                                                | Rue des Trois Ponts 2, Huy, 4500, Belgium                                                                           | Principal Investigator                                  | Investigators                                                                              |
| Tom                            | Mulleners     |                       |                  | Sint Franciscusziekenhuis                                 | Pastoor Paquaylaan, 129, Heusden-Zolder, 3550, Belgium                                                              | Principal Investigator                                  | Investigators                                                                              |
| Salvador                       | Rassi         |                       |                  | Hospital das Clínicas da Universidade Federal de Goiás    | Primeira avenida 545 2 andar Setor Universitario Goiania Sala de Insuficiencia Cardiaca, Goiânia, 74605-050, Brazil | Principal Investigator                                  | Investigators                                                                              |
| Adrian Paulo Morales           | Kormann       |                       |                  | Maestri E Kormann Consultoria Medico-Cientifica LTDA –EPP | Rua Floriano Peixoto 300 Centro, Blumenau, SC, 890100-500, Brazil                                                   | Principal Investigator                                  | Investigators                                                                              |
| Aline                          | Moraes        |                       |                  | Pontifícia Universidade Católica do ParanáCuritiba        | Rua Rockefeller Ambulatorio da Escola de Medicina 2andar PUC Trials Epicenter, Curitiba, Paraná, 80230-130, Brazil  | Principal Investigator                                  | Investigators                                                                              |

## Supplemental Online Content: Nonauthor Collaborators

\*Indicates required information. Only first name, last name, and suffix will appear in PubMed.

| First Name and Middle Initial* | *Last Name | *Suffix (eg, Jr, III) | Academic Degrees | Institution                                                | Location (city, state/province, country)                                                                       | Role or Contribution, eg, chair, principal investigator | Group (if more than 1 Group listed in the byline) and/or Subgroup (eg, Steering Committee) |
|--------------------------------|------------|-----------------------|------------------|------------------------------------------------------------|----------------------------------------------------------------------------------------------------------------|---------------------------------------------------------|--------------------------------------------------------------------------------------------|
| Euler Roberto Fernandes        | Manenti    |                       |                  | Hospital Mae de Deus - Porto Alegre                        | Cardiologia Rua Orfanotrofio 299 Alto Teresopolis, Porto Alegre, RS, 90110-270, Brazil                         | Principal Investigator                                  | Investigators                                                                              |
| Gilmar                         | Reis       |                       |                  | CardResearch Cardiologia Assistencial e de Pesquisa        | Cardiolab Cardiologia Diagnost Domingos Viera 300 Si 606 Santa Efigenia, Belo Horizonte, MG, 30150-240, Brazil | Principal Investigator                                  | Investigators                                                                              |
| Lilia Nigro                    | Maia       |                       |                  | Faculdade de Medicina de São José do Rio Preto             | Avenida Brigadeiro Faria Lima, 5416, São José do Rio Preto, São Paulo, 15090-000, Brazil                       | Principal Investigator                                  | Investigators                                                                              |
| Marcus Vinicius                | Simoies    |                       |                  | Hospital das Clinicas da Fac de Medicina de Rib. Preto USP | Campus Universitario s n Bloco G do subsolo II Monte Alegre, Ribeirao Preto, São Paulo, 14048-900, Brazil      | Principal Investigator                                  | Investigators                                                                              |
| Ricardo Pereira                | Silva      |                       |                  | Hospital Universitario Walter Cantidio                     | Rua Capitaio Francisco Pedro 1290 Rodolfo Teofilo, Fortaleza, CE, 60430370, Brazil                             | Principal Investigator                                  | Investigators                                                                              |
| Luiz Claudio                   | Danzmann   |                       |                  | Hospital Universitario Mae de Deus Canoas                  | Av Farroupilha 8001 Predio 21 recepcao, Canoas, Rio Grande do Sul, 92425 900, Brazil                           | Principal Investigator                                  | Investigators                                                                              |
| Jose Francisco Kerr            | Saraiva    |                       |                  | Instituto de Pesquisa Clinica de Campinas                  | Rua Oswaldo Oscar Barthelson1209, Campinas, SP, 13060 080, Brazil                                              | Principal Investigator                                  | Investigators                                                                              |

## Supplemental Online Content: Nonauthor Collaborators

\*Indicates required information. Only first name, last name, and suffix will appear in PubMed.

| First Name and Middle Initial*        | *Last Name  | *Suffix (eg, Jr, III) | Academic Degrees | Institution                          | Location (city, state/province, country)                                            | Role or Contribution, eg, chair, principal investigator | Group (if more than 1 Group listed in the byline) and/or Subgroup (eg, Steering Committee) |
|---------------------------------------|-------------|-----------------------|------------------|--------------------------------------|-------------------------------------------------------------------------------------|---------------------------------------------------------|--------------------------------------------------------------------------------------------|
| Maria Christiane Valeria Braga Braile | Sternieri   |                       |                  | Instituto Domingo Braile             | Rua Luiz Vaz de Camoes 3111 Redentora, Sao Jose do Rio Preto, SP, 15015-750, Brazil | Principal Investigator                                  | Investigators                                                                              |
| Weimar sebba Barroso                  | de Souza    |                       |                  | Via Medica Centro Clinico            | Rua T58 315 Sala 109 Setor Bueno, Goiania, 74223-130, Brazil                        | Principal Investigator                                  | Investigators                                                                              |
| Estevao Lanna                         | Figueiredo  |                       |                  | Hospital Vera Cruz                   | Rua Timbiras 3156 7 andar, Belo Horizonte, MG, 30140 062, Brazil                    | Principal Investigator                                  | Investigators                                                                              |
| Maria Lubomirova                      | Tzekova     |                       |                  | UMHAT Dr Georgi Stranski             | 8A Georgi Kochev Str, Pleven, 5800, Bulgaria                                        | Principal Investigator                                  | Investigators                                                                              |
| Boryana                               | Boeva       |                       |                  | MHAT Plovdiv AD                      | 234 Bulgaria Blvd, Plovdiv, 4000, Bulgaria                                          | Principal Investigator                                  | Investigators                                                                              |
| Dimo                                  | Vasilev     |                       |                  | UMHAT Sveti Georgi EAD               | 66 Peshtersko shosse Blvd, Plovdiv, 4002, Bulgaria                                  | Principal Investigator                                  | Investigators                                                                              |
| Snezhanka Tomova Tisheva              | Gospodinova |                       |                  | UMHAT Dr Georgi Stranski             | 8A Georgi Kochev str, Pleven, 5800, Bulgaria                                        | Principal Investigator                                  | Investigators                                                                              |
| Maria Hristova                        | Milanova    |                       |                  | UMHATEM N I Pirogov                  | Cardiology Department 21 Totleben Blvd, Sofia, 1606, Bulgaria                       | Principal Investigator                                  | Investigators                                                                              |
| Valentina Mincheva                    | Kabakchieva |                       |                  | NM Transport Hospital Tsar Boris III | 108 Knyaginya Maria Louisa Blvd, Sofia, 1233, Bulgaria                              | Principal Investigator                                  | Investigators                                                                              |
| Petkana Ivanova                       | Valchanova  |                       |                  | MHAT Shumen                          | 63 Vasil Aprilov Str, Shumen, 9700, Bulgaria                                        | Principal Investigator                                  | Investigators                                                                              |
| Bojidar                               | Dimov       |                       |                  | Fifth MHAT                           | 67A Gen. Stoletov Blvd, Sofia, 1233, Bulgaria                                       | Principal Investigator                                  | Investigators                                                                              |
| Plamen                                | Petrovsky   |                       |                  | Military Medical Academy             | 3 Georgi Sofiyski Str, Sofia, 1431, Bulgaria                                        | Principal Investigator                                  | Investigators                                                                              |

Supplemental Online Content: Nonauthor Collaborators

\*Indicates required information. Only first name, last name, and suffix will appear in PubMed.

| First Name and Middle Initial* | *Last Name | *Suffix (eg, Jr, III) | Academic Degrees | Institution                                                  | Location (city, state/province, country)                                         | Role or Contribution, eg, chair, principal investigator | Group (if more than 1 Group listed in the byline) and/or Subgroup (eg, Steering Committee) |
|--------------------------------|------------|-----------------------|------------------|--------------------------------------------------------------|----------------------------------------------------------------------------------|---------------------------------------------------------|--------------------------------------------------------------------------------------------|
| Petyo Georgiev                 | Georgiev   |                       |                  | UMHAT Palmed- MS Zdrave OOD                                  | 50 Konstantin Velichkov Str, Pazardzhik, 4400, Bulgaria                          | Principal Investigator                                  | Investigators                                                                              |
| Natalia                        | Spasova    |                       |                  | UMHAT Tsaritsa Yoanna                                        | ul. Byalo more 8 str, Sofia, 1527, Bulgaria                                      | Principal Investigator                                  | Investigators                                                                              |
| Georgi                         | Mazhdakov  |                       |                  | SHATC Sv Georgi Pernik                                       | 77 Sv Kiril and Metodii Str, Pernik, 2300, Bulgaria                              | Principal Investigator                                  | Investigators                                                                              |
| Mariana                        | Konteva    |                       |                  | Acibadem City Clinic SHATC                                   | 73 Stefan Stambolov blvd, Burgas, 8018, Bulgaria                                 | Principal Investigator                                  | Investigators                                                                              |
| Haralambi Obreshkov            | Benov      |                       |                  | MRHAT Dr Stephan Cherkezov AD                                | 1 Nish Str, Veliko Tarnovo, 5000, Bulgaria                                       | Principal Investigator                                  | Investigators                                                                              |
| Stefan Vesselinov              | Denchev    |                       |                  | Medical Institute Ministry of Interior Central Clinical Base | Clinic of Card and Intent Car 79 Skobelev blv, Sofia, 1606, Bulgaria             | Principal Investigator                                  | Investigators                                                                              |
| Marie                          | Parent     |                       |                  | Institut de Cardiologie de Montreal                          | 5000 rue Belanger east bureau S 2700, Montreal, QC, H1T 1C8, Canada              | Principal Investigator                                  | Investigators                                                                              |
| Catherine                      | Demers     |                       |                  | Hamilton General Hospital                                    | 237 Barton Street East DBCVSRI level 4 C4111, Hamilton, ON, L8L 2X2, Canada      | Principal Investigator                                  | Investigators                                                                              |
| Danielle                       | Dion       |                       |                  | CISSS-CA                                                     | Site Hôpital Saint-Georges, 1515 17e Rue, St-Georges Beauce, QC, G5Y 4T8, Canada | Principal Investigator                                  | Investigators                                                                              |
| Ronald L                       | Bourgeois  |                       |                  | G A Research Associates Ltd/Ltee                             | 206 1789 Mountain Road, Moncto, NB, E1G 1A7, Canada                              | Principal Investigator                                  | Investigators                                                                              |
| Michael Lawrence               | Heffernan  |                       |                  | Oakville Cardiologists                                       | 690 Dorval Drive Unit 300-1, Oakville, ON, L6K 3W7, Canada                       | Principal Investigator                                  | Investigators                                                                              |

## Supplemental Online Content: Nonauthor Collaborators

\*Indicates required information. Only first name, last name, and suffix will appear in PubMed.

| First Name and Middle Initial* | *Last Name  | *Suffix (eg, Jr, III) | Academic Degrees | Institution                                         | Location (city, state/province, country)                                | Role or Contribution, eg, chair, principal investigator | Group (if more than 1 Group listed in the byline) and/or Subgroup (eg, Steering Committee) |
|--------------------------------|-------------|-----------------------|------------------|-----------------------------------------------------|-------------------------------------------------------------------------|---------------------------------------------------------|--------------------------------------------------------------------------------------------|
| Gustavo Adolfo Moreno          | Silgado     |                       |                  | Oncomedica SA                                       | Carrera 6 No 72 34 Via Cerete, Monteria, Cordoba, 230002, Colombia      | Principal Investigator                                  | Investigators                                                                              |
| Franklin                       | Quiroz      |                       |                  | Fundacion de Investigacion Medica Sangil IPS        | Carrera 10 No 11 30 COL Santander, San Gil, Santander, 684031, Colombia | Principal Investigator                                  | Investigators                                                                              |
| Alberto                        | Cadena      |                       |                  | Clinica de La Costa                                 | Cra 50 No 80 90, Barranquilla, Atlantico, 080020, Colombia              | Principal Investigator                                  | Investigators                                                                              |
| Jose Luis Accini               | Mendoza     |                       |                  | IPS Centro Cientifico Asistencial SAS               | Carrera 43B No 80 101, Barranquilla, 080020, Colombia                   | Principal Investigator                                  | Investigators                                                                              |
| Clara                          | Saldarriaga |                       |                  | Centro Cardiovascular Colombiano Clinica Santamaria | Cll78B # 75 21, Medellin, Antioquia, 050036, Colombia                   | Principal Investigator                                  | Investigators                                                                              |
| Camilo                         | Arana       |                       |                  | Centro de Investigaciones Clinicas SAS              | Calle 9C No 50 25, Cali, Valle del Cauca, 760001, Colombia              | Principal Investigator                                  | Investigators                                                                              |
| Libor                          | Nechvatal   |                       |                  | Medical Center                                      | Hybesova 43, Brno, 60200, Czech Republic                                | Principal Investigator                                  | Investigators                                                                              |
| Katerina                       | Linhartova  |                       |                  | Kardiologie V sadech                                | Smetanovy sady 80/5, Plzen, 30100, Czech Republic                       | Principal Investigator                                  | Investigators                                                                              |
| Zdenek                         | Klimsa      |                       |                  | Nemocnice Jihlava Kardiologicke oddeni              | Vrchlickeho 59, Jihlava, 58633, Czech Republic                          | Principal Investigator                                  | Investigators                                                                              |
| Ladislav                       | Busak       |                       |                  | Interni a kardiologicka ambulance Louny             | Kosmonautu 2303, Louny, 44001, Czech Republic                           | Principal Investigator                                  | Investigators                                                                              |
| Dan                            | Marek       |                       |                  | Stredomoravska nemocnici a s - Nemocnice Prerov     | Dvorakova 75, Prerov, 751 52, Czech Republic                            | Principal Investigator                                  | Investigators                                                                              |

## Supplemental Online Content: Nonauthor Collaborators

\*Indicates required information. Only first name, last name, and suffix will appear in PubMed.

| First Name and Middle Initial* | *Last Name | *Suffix (eg, Jr, III) | Academic Degrees | Institution                           | Location (city, state/province, country)                                          | Role or Contribution, eg, chair, principal investigator | Group (if more than 1 Group listed in the byline) and/or Subgroup (eg, Steering Committee) |
|--------------------------------|------------|-----------------------|------------------|---------------------------------------|-----------------------------------------------------------------------------------|---------------------------------------------------------|--------------------------------------------------------------------------------------------|
| Josef                          | Slaby      |                       |                  | Oblastni nemocnice Kolin a s          | Zizkova 146, Kolin, 280 02, Czech Republic                                        | Principal Investigator                                  | Investigators                                                                              |
| Rostislav                      | Polasek    |                       |                  | Krajska Nemocnice Liberec AS          | Husova 10, Liberec, 46063, Czech Republic                                         | Principal Investigator                                  | Investigators                                                                              |
| Pavel                          | Koleckar   |                       |                  | Policka Nemonice S.R.O.               | Eimova 294, Policka, 57201, Czech Republic                                        | Principal Investigator                                  | Investigators                                                                              |
| Jiri                           | Carda      |                       |                  | Kardiologicka ambulance               | Vltavska 1289/10, Trebic, 67401, Czech Republic                                   | Principal Investigator                                  | Investigators                                                                              |
| Marta                          | Kaislerova |                       |                  | Nemocnice Tabor                       | Kapitana Jarose 2000/10, Tabor, 39003, Czech Republic                             | Principal Investigator                                  | Investigators                                                                              |
| Pavel                          | Trestik    |                       |                  | Kromerizska nemocnice a s             | Havlickova 660, Kromeriz, 76755, Czech Republic                                   | Principal Investigator                                  | Investigators                                                                              |
| Petr                           | Zajicek    |                       |                  | Nemocnice Valasske Mezirici a s       | Kardiologicka ambulance U Nemocnice 980, Valasske Mezirici, 75742, Czech Republic | Principal Investigator                                  | Investigators                                                                              |
| Jiri                           | Kuchar     |                       |                  | Kardiologie                           | T G Masaryka 187, Cesky Krumlov, 38101, Czech Republic                            | Principal Investigator                                  | Investigators                                                                              |
| Jiri                           | Vondrak    |                       |                  | Pardubicka krajska nemocnice          | Kyjevska 44, Pardubice, 53203, Czech Republic                                     | Principal Investigator                                  | Investigators                                                                              |
| Pavel                          | Koleckar   |                       |                  | Nemocnice pardubickeho kraje a s      | Kollarova 643/7, Svitavy, 56825, Czech Republic                                   | Principal Investigator                                  | Investigators                                                                              |
| Jiri                           | Krupicka   |                       |                  | Medicus Services s r o                | Nadrazni 1317, Brandys nad Labem, 25001, Czech Republic                           | Principal Investigator                                  | Investigators                                                                              |
| Tomas                          | Brychta    |                       |                  | Diaordinace Agentura Science Pro spol | Dlouha 521/34, Olomouc Lazce, 77900, Czech Republic                               | Principal Investigator                                  | Investigators                                                                              |



## Supplemental Online Content: Nonauthor Collaborators

\*Indicates required information. Only first name, last name, and suffix will appear in PubMed.

| First Name and Middle Initial* | *Last Name | *Suffix (eg, Jr, III) | Academic Degrees | Institution                                     | Location (city, state/province, country)                                                         | Role or Contribution, eg, chair, principal investigator | Group (if more than 1 Group listed in the byline) and/or Subgroup (eg, Steering Committee) |
|--------------------------------|------------|-----------------------|------------------|-------------------------------------------------|--------------------------------------------------------------------------------------------------|---------------------------------------------------------|--------------------------------------------------------------------------------------------|
| Pavel                          | Lang       |                       |                  | Nemocnice Jablonec nad Nisou p o                | Nemocnicni 15, Jablonec nad Nisou, 46660, Czech Republic                                         | Principal Investigator                                  | Investigators                                                                              |
| Hans                           | Rickers    |                       |                  | Regions hospitalet Randers                      | Oestervangsvej 54, Randers, 8930, Denmark                                                        | Principal Investigator                                  | Investigators                                                                              |
| Jens Dahlgaard                 | Hove       |                       |                  | Hvidovre Hospital                               | Medicinsk enhed afsnit 259 Kettegaard Alle 30, Hvidovre, 2650, Denmark                           | Principal Investigator                                  | Investigators                                                                              |
| Ida                            | Gustafsson |                       |                  | Hvidovre Hospital                               | Medicinsk enhed afsnit 259 Kettegaard Alle 30, Hvidovre, 2650, Denmark                           | Principal Investigator                                  | Investigators                                                                              |
| Olav Wendelboe                 | Nielsen    |                       |                  | Bispebjerg Hospital                             | Hjerteafdelingen – Cardiometabolic Bispebjerg Bakke 23 Bygning 67, Copenhagen, NV, 2400, Denmark | Principal Investigator                                  | Investigators                                                                              |
| Tiina                          | Uuetoa     |                       |                  | East Tallinn Central Hospital                   | Ravi Street 18, Tallinn, 10138, Estonia                                                          | Principal Investigator                                  | Investigators                                                                              |
| Silvia                         | Noodla     |                       |                  | Tartu University Hospital                       | L.Puusepa 1a, Tartu, 51014, Estonia                                                              | Principal Investigator                                  | Investigators                                                                              |
| Arvo                           | Rosenthal  |                       |                  | Dr. Arvo Rosenthal LLC                          | Sütiste Str. 19A, Tallinn, 13419, Estonia                                                        | Principal Investigator                                  | Investigators                                                                              |
| Riina                          | Vettus     |                       |                  | North Estonia Medical Centre Foundation Tallinn | J Sutiste tee 19, Tallinn, 13419, Estonia                                                        | Principal Investigator                                  | Investigators                                                                              |
| Laurent                        | Fauchier   |                       |                  | CHRU – Hospital Trousseau                       | Avenue de la Republique, Chambray les Tours, 37170, France                                       | Principal Investigator                                  | Investigators                                                                              |
| Victor                         | Aboyans    |                       |                  | CHU Dupuytren de Limoges                        | 2 Avenue Martin Luther King, Limoges cedex, 87042, France                                        | Principal Investigator                                  | Investigators                                                                              |

## Supplemental Online Content: Nonauthor Collaborators

\*Indicates required information. Only first name, last name, and suffix will appear in PubMed.

| First Name and Middle Initial* | *Last Name | *Suffix (eg, Jr, III) | Academic Degrees | Institution                                    | Location (city, state/province, country)                                          | Role or Contribution, eg, chair, principal investigator | Group (if more than 1 Group listed in the byline) and/or Subgroup (eg, Steering Committee) |
|--------------------------------|------------|-----------------------|------------------|------------------------------------------------|-----------------------------------------------------------------------------------|---------------------------------------------------------|--------------------------------------------------------------------------------------------|
| Teodora Monica                 | DUTOIU     |                       |                  | Centre Hospitalier Louis Pasteur               | 5 Etage 3 4 rue Claude Bernard, Le Coudray, 28630, France                         | Principal Investigator                                  | Investigators                                                                              |
| Eric                           | Decoux     |                       |                  | Centre Hospitalier DRON Hospital Guy Chatiliez | Service de Cardiologie 135 rue du President Coty BP 619, Tourcoing, 59200, France | Principal Investigator                                  | Investigators                                                                              |
| Guillaume De                   | Geeter     |                       |                  | Polyclinique Vauban                            | 10 avenue Vauban, Valenciennes, 59300, France                                     | Principal Investigator                                  | Investigators                                                                              |
| Patrick                        | Khanoyan   |                       |                  | Hopital Saint-Joseph Marseille                 | 26 Boulevard Louvain, Marseille, 13285, France                                    | Principal Investigator                                  | Investigators                                                                              |
| Erwan                          | Donal      |                       |                  | CHRU Hôpital Pontchaillou                      | 2 rue Henri Le Guilloux, Renees Cedex 9, 35033, France                            | Principal Investigator                                  | Investigators                                                                              |
| Yann                           | Rosamel    |                       |                  | Centre Hospitalier Sud Francilien              | 40, avenue Serge Dassault, Corbeil Essonnes, 91100, France                        | Principal Investigator                                  | Investigators                                                                              |
| Emmanuelle                     | Berthelot  |                       |                  | Hopital Kremlin Bicetre                        | 78 Rue du General Leclerc, Le Kremlin Bicetre, 94275, France                      | Principal Investigator                                  | Investigators                                                                              |
| Marie-France                   | Seronde    |                       |                  | Hopital Universitaire J Minjoz                 | Hospital de Jour 3 boulevard Fleming, Besancon cedex, 25030, France               | Principal Investigator                                  | Investigators                                                                              |
| Bernhard Rudolf                | Winkelmann |                       |                  | ClinPhenomix GmbH and Co KG Studienzentrum     | Walter Kolb Str 9 11, Frankfurt, 60594, Germany                                   | Principal Investigator                                  | Investigators                                                                              |
| Wilma                          | Grosskopf  |                       |                  | GemeinschaftspraxisvDres Grosskopf             | Ahornstrasse 2a,vWallerfing, 94574, Germany                                       | Principal Investigator                                  | Investigators                                                                              |

## Supplemental Online Content: Nonauthor Collaborators

\*Indicates required information. Only first name, last name, and suffix will appear in PubMed.

| First Name and Middle Initial* | *Last Name      | *Suffix (eg, Jr, III) | Academic Degrees | Institution                                                  | Location (city, state/province, country)                                         | Role or Contribution, eg, chair, principal investigator | Group (if more than 1 Group listed in the byline) and/or Subgroup (eg, Steering Committee) |
|--------------------------------|-----------------|-----------------------|------------------|--------------------------------------------------------------|----------------------------------------------------------------------------------|---------------------------------------------------------|--------------------------------------------------------------------------------------------|
| Johannes                       | Haas            |                       |                  | CIMS Studienzentrum                                          | Buger Str 82, Bamberg, 96049, Germany                                            | Principal Investigator                                  | Investigators                                                                              |
| Bernhard                       | Schmitt         |                       |                  | Studienzentrum Mainz Mitte                                   | Grosse Langgasse 1A, Mainz, 55116, Germany                                       | Principal Investigator                                  | Investigators                                                                              |
| Norbert                        | Jahnke          |                       |                  | Studienzentrum der Herzklinik Ulm GbR                        | Magirusstr 49, Ulm, 89077, Germany                                               | Principal Investigator                                  | Investigators                                                                              |
| Andreas                        | Wilke           |                       |                  | Kardiologische Praxis Dr. Andreas Wilke Dr. Andrej Malazhavy | Hauptkanal links 100, Papenburg, 26871, Germany                                  | Principal Investigator                                  | Investigators                                                                              |
| Gregor                         | Simonis         |                       |                  | Facharztzentrum Dresden Neustadt GbR fuer Klin Pruefungen    | Forststrasse 3, Dresden, 01099, Germany                                          | Principal Investigator                                  | Investigators                                                                              |
| Peter                          | Bosiljanoff     |                       |                  | Herz Gefaess Zentrum Nymphenburg                             | Franz Schrank Str 2, Munich, 80638, Germany                                      | Principal Investigator                                  | Investigators                                                                              |
| Nikolaos                       | Proskynitopoulo |                       |                  | Kardiologische Praxis Nienburg                               | Ziegelkampstr 37,                                                                | Principal Investigator                                  | Investigators                                                                              |
| Christoph                      | Axthelm         |                       |                  | Cardiologicum Dresden und Pirna                              | Enderstrasse 59 Haus A2, Dresden, 01277, Germany                                 | Principal Investigator                                  | Investigators                                                                              |
| Isabelle                       | Schenkenberger  |                       |                  | Klinische Forschung Berlin                                   | Ansbacher Str 17 19, Berlin, 10787, Germany                                      | Principal Investigator                                  | Investigators                                                                              |
| Felix                          | Proepper        |                       |                  | POLIKUM Institut GmbH Standort Polikum Friedenau             | Rubensstr 119, Berlin, 12157, Germany                                            | Principal Investigator                                  | Investigators                                                                              |
| Norbert                        | Frey            |                       |                  | Universitaetsklinikum Schleswig Holstein Campus Kiel         | Klinik f kardiologie and Angiologi Arnold-Heller Strasse 3, Kiel, 24105, Germany | Principal Investigator                                  | Investigators                                                                              |
| Frank                          | Edelmann        |                       |                  | Charite Berlin Campus Virchow Klinikum                       | Gelände Ostring 1 Ebene 0 Augustenburger Platz 1, Berlin, 13353, Germany         | Principal Investigator                                  | Investigators                                                                              |
| Christian                      | Fechtrup        |                       |                  | Praxis Dr. Christian Fechtrup                                | Himmelreichallee 37-41, Muenster, 48149, Germany                                 | Principal Investigator                                  | Investigators                                                                              |

## Supplemental Online Content: Nonauthor Collaborators

\*Indicates required information. Only first name, last name, and suffix will appear in PubMed.

| First Name and Middle Initial* | *Last Name | *Suffix (eg, Jr, III) | Academic Degrees | Institution                                                     | Location (city, state/province, country)                                                    | Role or Contribution, eg, chair, principal investigator | Group (if more than 1 Group listed in the byline) and/or Subgroup (eg, Steering Committee) |
|--------------------------------|------------|-----------------------|------------------|-----------------------------------------------------------------|---------------------------------------------------------------------------------------------|---------------------------------------------------------|--------------------------------------------------------------------------------------------|
| Tobias                         | Graf       |                       |                  | Universitaetsklinikum Schleswig Holstein Campus                 | Kardiologie Angiologie Intensivmedizin<br>Ratzeburger Allee 160,<br>Luebeck, 23538, Germany | Principal Investigator                                  | Investigators                                                                              |
| Mirko                          | Seidel     |                       |                  | Unfallkrankenhaus Berlin                                        | Klinik fur Innere Medizin<br>Warener Str. 7, Berlin,<br>12683, Germany                      | Principal Investigator                                  | Investigators                                                                              |
| Wolfgang                       | Fehske     |                       |                  | St. Vinzenz-Hospital                                            | Merheimer Str. 221-223<br>Kardiologie, Koeln-Nippes,<br>Cologne, 50733, Germany             | Principal Investigator                                  | Investigators                                                                              |
| Martin                         | Prohaska   |                       |                  | Praxis Herznah Dr med Prohaska und Dr med Schulte               | Schluesselbergstr 6,<br>Muehldorf, 84453,<br>Germany                                        | Principal Investigator                                  | Investigators                                                                              |
| Bernhard                       | Unsoeld    |                       |                  | Universitaetsklinikum Regensburg                                | Franz Josef Strauss Allee 11, Regensburg, 93053, Germany                                    | Principal Investigator                                  | Investigators                                                                              |
| Christoph                      | Birner     |                       |                  | Universitaetsklinikum Regensburg                                | Franz Josef Strauss Allee 11, Regensburg, 93053, Germany                                    | Principal Investigator                                  | Investigators                                                                              |
| Wolfgang                       | Jungmair   |                       |                  | Kardiologische Praxis Dr med Wolfgang Jungmair                  | Louisenstr 63, Bad Homburg, 61348, Germany                                                  | Principal Investigator                                  | Investigators                                                                              |
| Andreas                        | Hoelscher  |                       |                  | Diabetologisch Internistisch Kardiologische Gemeinschaftspraxis | Dalbergstrasse 22, Fulda, 36037, Germany                                                    | Principal Investigator                                  | Investigators                                                                              |
| Christoph                      | Kadel      |                       |                  | Staedtische Kliniken Frankfurt Hoechst                          | Gotenstrasse 6-8,<br>Frankfurt, 65929,<br>Germany                                           | Principal Investigator                                  | Investigators                                                                              |
| Kishor                         | Lahiri     |                       |                  | Staedtische Kliniken Frankfurt Hoechst                          | Gotenstrasse 6-8,<br>Frankfurt, 65929,<br>Germany                                           | Principal Investigator                                  | Investigators                                                                              |

## Supplemental Online Content: Nonauthor Collaborators

\*Indicates required information. Only first name, last name, and suffix will appear in PubMed.

| First Name and Middle Initial* | *Last Name | *Suffix (eg, Jr, III) | Academic Degrees | Institution                                           | Location (city, state/province, country)                                             | Role or Contribution, eg, chair, principal investigator | Group (if more than 1 Group listed in the byline) and/or Subgroup (eg, Steering Committee) |
|--------------------------------|------------|-----------------------|------------------|-------------------------------------------------------|--------------------------------------------------------------------------------------|---------------------------------------------------------|--------------------------------------------------------------------------------------------|
| Heidrun                        | Mehling    |                       |                  | Franz Volhard Clinical Research center                | Charite Campus Berlin<br>Buch Lindenberger Weg<br>80, Berlin Buch, 13125,<br>Germany | Principal Investigator                                  | Investigators                                                                              |
| Andreas                        | Hagenow    |                       |                  | Zentrum fur Klinische Studien<br>Suedbrandenburg GmbH | Lange Strasse 13,<br>Elsterwerda, 04910,<br>Germany                                  | Principal Investigator                                  | Investigators                                                                              |
| Ingomar F K                    | Naudts     |                       |                  | Praxis Dres Med Naudts und<br>Nowack                  | Ludwig Erhardt Platz 11,<br>Rodgau, 63110, Germany                                   | Principal Investigator                                  | Investigators                                                                              |
| Jan                            | Winkler    |                       |                  | Klinische Forschung Dresden GmbH                      | Prager Strasse 10,<br>Dresden, 01069, Germany                                        | Principal Investigator                                  | Investigators                                                                              |
| Peter                          | Salbach    |                       |                  | Ze:ro PRAXEN                                          | Georg Lechleiter Platz 3,<br>Mannheim, 68165,<br>Germany                             | Principal Investigator                                  | Investigators                                                                              |
| Ronald                         | Naumann    |                       |                  | MVZ Polymed                                           | Yorkstrasse 35, Chemnitz,<br>09130, Germany                                          | Principal Investigator                                  | Investigators                                                                              |
| Holger                         | Killat     |                       |                  | Kardiologische Praxis Dr Killat                       | Hans Boeckler Str 25,<br>Hassloch, 67454, Germany                                    | Principal Investigator                                  | Investigators                                                                              |
| Dirk                           | Bastian    |                       |                  | Klinikum Fuerth                                       | Kardiologie Jakob-Henle-<br>Str. 1, Fuerth, 90766,<br>Germany                        | Principal Investigator                                  | Investigators                                                                              |
| Anselm Tobias                  | Baeumer    |                       |                  | Praxis Dres Klaer                                     | Wiener Platz 5, Cologne,<br>51065, Germany                                           | Principal Investigator                                  | Investigators                                                                              |
| Britta                         | Goldmann   |                       |                  | Asklepios Klinik Harburg                              | Eissendorfer Pferdeweg<br>52, Hamburg, 21075,<br>Germany                             | Principal Investigator                                  | Investigators                                                                              |
| Alessandro                     | Cuneo      |                       |                  | Klinikum Westmuensterland<br>Krankenhaus Maria Hilf   | Innere Medizin Vredener<br>Strasse 58, Stadtlohn,<br>48703, Germany                  | Principal Investigator                                  | Investigators                                                                              |
| Florian                        | Hoepfner   |                       |                  | Martin Luther Universitaet Halle<br>Wittenberg        | Ernst Grube Str 40,<br>Halle/Saale, 06120,<br>Germany                                | Principal Investigator                                  | Investigators                                                                              |

## Supplemental Online Content: Nonauthor Collaborators

\*Indicates required information. Only first name, last name, and suffix will appear in PubMed.

| First Name and Middle Initial* | *Last Name | *Suffix (eg, Jr, III) | Academic Degrees | Institution                                 | Location (city, state/province, country)                         | Role or Contribution, eg, chair, principal investigator | Group (if more than 1 Group listed in the byline) and/or Subgroup (eg, Steering Committee) |
|--------------------------------|------------|-----------------------|------------------|---------------------------------------------|------------------------------------------------------------------|---------------------------------------------------------|--------------------------------------------------------------------------------------------|
| Michel                         | Noutsias   |                       |                  | Martin Luther Universitaet Halle Wittenberg | Ernst Grube Str 40, Halle/Saale, 06120, Germany                  | Principal Investigator                                  | Investigators                                                                              |
| Jens                           | Beermann   |                       |                  | Kardiologische Praxis Dr. Jens Beermann     | Rosengarten 5, Wedel, 22880, Germany                             | Principal Investigator                                  | Investigators                                                                              |
| Werner                         | Rieker     |                       |                  | Gemeinschaftspraxis Rankestrasse            | Rankestr 34, Berlin, 10789, Germany                              | Principal Investigator                                  | Investigators                                                                              |
| Dominik                        | Buckert    |                       |                  | Universitaetsklinikum Ulm                   | Albert-Einstein-Allee 23, Ulm, 89081, Germany                    | Principal Investigator                                  | Investigators                                                                              |
| Jochen                         | Woehrle    |                       |                  | Universitaetsklinikum Ulm                   | Albert-Einstein-Allee 23, Ulm, 89081, Germany                    | Principal Investigator                                  | Investigators                                                                              |
| Julian                         | Westphal   |                       |                  | Universitaetsklinikum Jena                  | Kardiologie Innere Medizin I Am Klinikum 1, Jena, 07747, Germany | Principal Investigator                                  | Investigators                                                                              |
| Tarek                          | Bekfani    |                       |                  | Universitaetsklinikum Jena                  | Kardiologie Innere Medizin I Am Klinikum 1, Jena, 07747, Germany | Principal Investigator                                  | Investigators                                                                              |
| Stefan                         | Stoerk     |                       |                  | Universitaetsklinikum Wuerzburg             | Am Schwarzenberg 15 Haus A15, Wuerzburg, 97078, Germany          | Principal Investigator                                  | Investigators                                                                              |
| Steffen                        | Schnupp    |                       |                  | Klinikum Coburg                             | Ketschendorfer Str 33, Coburg, 96450, Germany                    | Principal Investigator                                  | Investigators                                                                              |
| Reinhard                       | Stoehring  |                       |                  | Kardiologische Praxis Dr Stoehring          | Hessenring 92a, Bad Homburg, 61348, Germany                      | Principal Investigator                                  | Investigators                                                                              |
| Till                           | Neumann    |                       |                  | Kardiologie Wattenscheid                    | Voedestrasse 79, Bochum, 44866, Germany                          | Principal Investigator                                  | Investigators                                                                              |
| Markus                         | Knapp      |                       |                  | Kardiologische Praxis Dr. Knapp,            | Weilerwiese 5, Schwaebisch Hall, 74523, Germany                  | Principal Investigator                                  | Investigators                                                                              |

## Supplemental Online Content: Nonauthor Collaborators

\*Indicates required information. Only first name, last name, and suffix will appear in PubMed.

| First Name and Middle Initial* | *Last Name   | *Suffix (eg, Jr, III) | Academic Degrees | Institution                                             | Location (city, state/province, country)                                                                                    | Role or Contribution, eg, chair, principal investigator | Group (if more than 1 Group listed in the byline) and/or Subgroup (eg, Steering Committee) |
|--------------------------------|--------------|-----------------------|------------------|---------------------------------------------------------|-----------------------------------------------------------------------------------------------------------------------------|---------------------------------------------------------|--------------------------------------------------------------------------------------------|
| Jana                           | Bourgeois    |                       |                  | GPR Klinikum, August Bebel Str 59                       | Ruesselsheim, 65428, Germany                                                                                                | Principal Investigator                                  | Investigators                                                                              |
| Klaus                          | Edel         |                       |                  | Herz- und Kreislaufzentrum Rotenburg,                   | Heinz-Meise-Str. 100, Rotenburg an der Fulda, 36199, Germany                                                                | Principal Investigator                                  | Investigators                                                                              |
| Hans-Eckart                    | Sarnighausen |                       |                  | Praxis Oedeme Dr. med.                                  | Hans-Eckert Sarnighausen, Auf der Hoehe 69, Lüneburg, 21339, Germany                                                        | Principal Investigator                                  | Investigators                                                                              |
| Thorsten                       | Nitschke     |                       |                  | Katholisches Krankenhaus Dortmund West                  | Zollernstrasse 40, Dortmund, 44379, Germany                                                                                 | Principal Investigator                                  | Investigators                                                                              |
| Michael                        | Jeserich     |                       |                  | Kardiologische Gemeinschaftspraxis Dr.                  | Jeserich, Königstr. 39, Nuremberg, 90402, Germany                                                                           | Principal Investigator                                  | Investigators                                                                              |
| Henning                        | Ebelt        |                       |                  | Katholisches Krankenhaus St Johann Nepomuk,             | Innere Med II Kardiologie Haarbergstr 72, Erfurt, 99097, Germany                                                            | Principal Investigator                                  | Investigators                                                                              |
| Axel                           | Linke        |                       |                  | Herzzentrum Dresden GmbH                                | Technische Universität Dresden Universitätsklinik Medizinische Klinik / Kardiologie Studienzentrum, Dresden, 01307, Germany | Principal Investigator                                  | Investigators                                                                              |
| Regina                         | Gaub         |                       |                  | Gemeinschaftspraxis Dr med Regina Gaub,                 | Kardiologie Zimmerstr 7, Potsdam, 14471, Germany                                                                            | Principal Investigator                                  | Investigators                                                                              |
| Tim                            | Sueselbeck   |                       |                  | Kardiologische Praxisklinik Ludwigshafen Cardio-Science | Ludwig-Guttman-Str. 11, Ludwigshafen, 67071, Germany                                                                        | Principal Investigator                                  | Investigators                                                                              |
| Matthias                       | Stratmann    |                       |                  | Kardiologische PraxisGemeinschaft Kampstrasse           | Kampstrasse 45, Dortmund, 44137, Germany                                                                                    | Principal Investigator                                  | Investigators                                                                              |

## Supplemental Online Content: Nonauthor Collaborators

\*Indicates required information. Only first name, last name, and suffix will appear in PubMed.

| First Name and Middle Initial* | *Last Name     | *Suffix (eg, Jr, III) | Academic Degrees | Institution                         | Location (city, state/province, country)                                             | Role or Contribution, eg, chair, principal investigator | Group (if more than 1 Group listed in the byline) and/or Subgroup (eg, Steering Committee) |
|--------------------------------|----------------|-----------------------|------------------|-------------------------------------|--------------------------------------------------------------------------------------|---------------------------------------------------------|--------------------------------------------------------------------------------------------|
| Nicole                         | Toursarkissian |                       |                  | Praxis Dr med Nicole Toursarkissian | Heinz Galinski Str 1, Berlin, 13347, Germany                                         | Principal Investigator                                  | Investigators                                                                              |
| Inga                           | Steinebach     |                       |                  | Praxis Ueberruhr                    | Studienzentrum Ruhr Klapperstrasse 53, Essen, 45277, Germany                         | Principal Investigator                                  | Investigators                                                                              |
| Florian                        | Krackhardt     |                       |                  | Praxis am Spreebogen                | Kardiologische und Angiologische Alt Moabit 101b, Berlin, D 10559, Germany           | Principal Investigator                                  | Investigators                                                                              |
| Robert                         | Schueler       |                       |                  | Contilia Herz und Gefaesszentrum    | Klinik fuer Kardiologie und Angiologie Klara Kopp Weg 1, Essen, 45138, Germany       | Principal Investigator                                  | Investigators                                                                              |
| Michael                        | Brandt         |                       |                  | Ruppiner Kliniken GmbH              | Fehrbelliner Str 38, Neuruppin, 16816, Germany                                       | Principal Investigator                                  | Investigators                                                                              |
| Jens                           | Placke         |                       |                  | CardioConsil GmbH                   | Zentrum für kardiale Implantate und Telemedizin Suedring 81, Rostock, 18059, Germany | Principal Investigator                                  | Investigators                                                                              |
| Verena                         | Stangl         |                       |                  | Universitaetsmedizin Charite        | Chariteplatz 1, Berlin, 10117, Germany                                               | Principal Investigator                                  | Investigators                                                                              |
| Christoph                      | Schoebel       |                       |                  | Universitaetsmedizin Charite        | Chariteplatz 1, Berlin, 10117, Germany                                               | Principal Investigator                                  | Investigators                                                                              |
| Diethelm                       | Tschoepe       |                       |                  | Herz und Diabetes Zentrum NRW       | Georgstr 11, Bad Oeynhausen, 32545, Germany                                          | Principal Investigator                                  | Investigators                                                                              |



## Supplemental Online Content: Nonauthor Collaborators

\*Indicates required information. Only first name, last name, and suffix will appear in PubMed.

| First Name and Middle Initial* | *Last Name | *Suffix (eg, Jr, III) | Academic Degrees | Institution                                        | Location (city, state/province, country)                                                               | Role or Contribution, eg, chair, principal investigator | Group (if more than 1 Group listed in the byline) and/or Subgroup (eg, Steering Committee) |
|--------------------------------|------------|-----------------------|------------------|----------------------------------------------------|--------------------------------------------------------------------------------------------------------|---------------------------------------------------------|--------------------------------------------------------------------------------------------|
| Ulrich                         | Overhoff   |                       |                  | Zentrum fuer Praevention und Rehabilitation Siegen | Schwerpunkt Herz Gefaesse Diabetes Pfarrstr 4, Siegen, 57072, Germany                                  | Principal Investigator                                  | Investigators                                                                              |
| Gunter                         | Stenzel    |                       |                  | Kardiologische Gemeinschaftspraxis Riesa           | Alexander-Puschkin-Platz 4C, Riesa, 01589, Germany                                                     | Principal Investigator                                  | Investigators                                                                              |
| Christoph                      | Stellbrink |                       |                  | Staedtisches Klinikum Bielefeld Mitte              | Teutoburger Str 50, Bielefeld, 33604, Germany                                                          | Principal Investigator                                  | Investigators                                                                              |
| Markus                         | Schwefer   |                       |                  | Elblandklinikum Riesa                              | Klinik fuer Innere Medizin I Kardiologie nd Intensivmedizin Weinbergstr 8, Riesa, 01589, Germany Riesa | Principal Investigator                                  | Investigators                                                                              |
| Eduard                         | Lorenz     |                       |                  | MVZ Brueel Arztpraxen der Sana Hanse Klinikum GmbH | Schwerinerstr 44, Brueel, 19412, Germany                                                               | Principal Investigator                                  | Investigators                                                                              |
| Peter                          | Uebel      |                       |                  | Haus der Gesundheit                                | Leiniger Str. 53, Ludwigshafen, 67067, Germany                                                         | Principal Investigator                                  | Investigators                                                                              |
| Dirk                           | Gluesing   |                       |                  | Sana Hanse Klinikum Wismar MVZ                     | Störtebeker Str. 6, Wismar, 23966, Germany                                                             | Principal Investigator                                  | Investigators                                                                              |
| Matthias                       | Weissbrodt |                       |                  | Kardiologische Gem.praxis Dres. Loebe              | Weissbrodt, Johannisplatz 1, Leipzig, 04103, Germany                                                   | Principal Investigator                                  | Investigators                                                                              |

## Supplemental Online Content: Nonauthor Collaborators

\*Indicates required information. Only first name, last name, and suffix will appear in PubMed.

| First Name and Middle Initial* | *Last Name  | *Suffix (eg, Jr, III) | Academic Degrees | Institution                                                                    | Location (city, state/province, country)                                                                                       | Role or Contribution, eg, chair, principal investigator | Group (if more than 1 Group listed in the byline) and/or Subgroup (eg, Steering Committee) |
|--------------------------------|-------------|-----------------------|------------------|--------------------------------------------------------------------------------|--------------------------------------------------------------------------------------------------------------------------------|---------------------------------------------------------|--------------------------------------------------------------------------------------------|
| Fiete                          | John        |                       |                  | Klinikum Lippe GmbH                                                            | Kardiologie<br>Angiologie und<br>internistische<br>Intensivmedizin.<br>Roentgenstr 18,<br>Detmold, 32756,<br>Germany           | Principal Investigator                                  | Investigators                                                                              |
| Juan Luis                      | Arango      |                       |                  | Clinica Dr Juan Luis Arango                                                    | 4ta Av 15 73<br>Zona 10 Edificio<br>Clinicas Medicas Of<br>803, Guatemala City,<br>01010, Guatemala                            | Principal Investigator                                  | Investigators                                                                              |
| Jose Miguel                    | Castellanos |                       |                  | Clínica Dr Jose Castellanos                                                    | 6a Avenida 7 39 Zona 10<br>Edificio Las Brisas<br>Oficina 201,<br>Guatemala City,<br>01010, Guatemala                          | Principal Investigator                                  | Investigators                                                                              |
| Clara                          | Chang       |                       |                  | Clinica Dra Chang, 8a<br>calle 11 13 zona 1<br>Edificio Recinos<br>Oficina 403 | Guatemala City,<br>01001, Guatemala                                                                                            | Principal Investigator                                  | Investigators                                                                              |
| Franklin                       | Haase       |                       |                  | Clínica Dr Franklin Haase                                                      | 14 calle A 2<br>25 zona 1, Guatemala<br>City, 01001,<br>Guatemala                                                              | Principal Investigator                                  | Investigators                                                                              |
| Edgar Miguel                   | Lopez       |                       |                  | Clinica Dr Edgar Lopez                                                         | 6a. Avenida 8<br>71 Zona 10 Clinicas<br>Herrera LLerandi<br>Oficina 15 Nivel 3 Ala<br>Sur, Guatemala City,<br>01010, Guatemala | Principal Investigator                                  | Investigators                                                                              |

Supplemental Online Content: Nonauthor Collaborators

\*Indicates required information. Only first name, last name, and suffix will appear in PubMed.

| First Name and Middle Initial* | *Last Name | *Suffix (eg, Jr, III) | Academic Degrees | Institution                        | Location (city, state/province, country)                                                                                                | Role or Contribution, eg, chair, principal investigator | Group (if more than 1 Group listed in the byline) and/or Subgroup (eg, Steering Committee) |
|--------------------------------|------------|-----------------------|------------------|------------------------------------|-----------------------------------------------------------------------------------------------------------------------------------------|---------------------------------------------------------|--------------------------------------------------------------------------------------------|
| Alvaro                         | Ovando     |                       |                  | Clinica Dr Alvaro Ovando           | 2a Calle 25-19 Zona 15 Vista<br>Hermosa I Edificio<br>Multimedica Oficina<br>903, Guatemala City,<br>01015, Guatemala                   | Principal Investigator                                  | Investigators                                                                              |
| Veronica                       | Paniagua   |                       |                  | Clinica Dra Paniagua               | 6 Avenida 9 18 zona<br>10 Edificio Sixtino II<br>Ala 1 Clinica 902,<br>Guatemala City,<br>01010, Guatemala                              | Principal Investigator                                  | Investigators                                                                              |
| Maribel                        | Vogel      |                       |                  | Clinica Dra Vogel                  | Calzada Roosevelt<br>22 43 Zona 11<br>Edificio Tikal Futura<br>Torre Luna 7 Nivel<br>Oficina 7C,<br>Guatemala City,<br>01011, Guatemala | Principal Investigator                                  | Investigators                                                                              |
| Marco Antonio Rodas            | Estrada    |                       |                  | Unidad De Diagnostico Cardiologico | 10 calle<br>3-12 zona 1,<br>Guatemala City,<br>01001, Guatemala                                                                         | Principal Investigator                                  | Investigators                                                                              |
| Iris                           | Rodriguez  |                       |                  | Clinica Dra Iris Rodriguez         | 10 calle 5-<br>37 zona 10 Oficina 3A<br>3 Nivel Ed Torre<br>Ciudad Vieja,<br>Guatemala, 01010,<br>Guatemala                             | Principal Investigator                                  | Investigators                                                                              |

## Supplemental Online Content: Nonauthor Collaborators

\*Indicates required information. Only first name, last name, and suffix will appear in PubMed.

| First Name and Middle Initial* | *Last Name | *Suffix (eg, Jr, III) | Academic Degrees | Institution                                                     | Location (city, state/province, country)                                                              | Role or Contribution, eg, chair, principal investigator | Group (if more than 1 Group listed in the byline) and/or Subgroup (eg, Steering Committee) |
|--------------------------------|------------|-----------------------|------------------|-----------------------------------------------------------------|-------------------------------------------------------------------------------------------------------|---------------------------------------------------------|--------------------------------------------------------------------------------------------|
| Vinicio                        | Corona     |                       |                  | Clinica Dr Vinicio Corona                                       | 6a Avenida<br>7-39 Zona 10 Edificio<br>Las Brisas Oficina<br>205, Guatemala City,<br>01010, Guatemala | Principal Investigator                                  | Investigators                                                                              |
| Janos                          | Takacs     |                       |                  | TanaMed Kft                                                     | Hunyadi<br>Janos u 14,<br>Mosanmagyarovar,<br>9200, Hungary                                           | Principal Investigator                                  | Investigators                                                                              |
| Albert                         | Varga      |                       |                  | SZTE Csaladorvosi<br>Intezet                                    | Tisza Lajos<br>Krt 109, Szeged,<br>6720, Hungary                                                      | Principal Investigator                                  | Investigators                                                                              |
| Noemi                          | Nyolczas   |                       |                  | Magyar Honvedseg<br>Egeszsegugyi<br>kozpont                     | Kardiologiai<br>Osztaly Robert K krt<br>44, Budapest, 1134,<br>Hungary                                | Principal Investigator                                  | Investigators                                                                              |
| Akos                           | Kalina     |                       |                  | Magyar Honvedseg<br>Egeszsegugyi<br>kozpont                     | Kardiologiai<br>Szakrendelo Robert<br>Karoly krt 44,<br>Budapest, 1134,<br>Hungary                    | Principal Investigator                                  | Investigators                                                                              |
| Andras Csaba                   | Nagy       |                       |                  | Fovarosi<br>Onkormanyzat Uzsoki<br>utcai Korhaza                | Uzsoki<br>u 29 41, Budapest,<br>1145, Hungary                                                         | Principal Investigator                                  | Investigators                                                                              |
| Bela                           | Merkely    |                       |                  | Semmelweis Egyetem<br>Varosmajori Sziv<br>Ergyogyaszati Klinika | Varosmajor u 68,<br>Budapest, 1122,<br>Hungary                                                        | Principal Investigator                                  | Investigators                                                                              |
| Ashwani                        | Mehta      |                       |                  | Sir Ganga Ram<br>Hospital                                       | Dharm Vlra<br>Heart Institute, 5th<br>Floor, Rajinder Road,<br>New Delhi, 110060,<br>India            | Principal Investigator                                  | Investigators                                                                              |

## Supplemental Online Content: Nonauthor Collaborators

\*Indicates required information. Only first name, last name, and suffix will appear in PubMed.

| First Name and Middle Initial* | *Last Name | *Suffix (eg, Jr, III) | Academic Degrees | Institution                                 | Location (city, state/province, country)                                                                                                            | Role or Contribution, eg, chair, principal investigator | Group (if more than 1 Group listed in the byline) and/or Subgroup (eg, Steering Committee) |
|--------------------------------|------------|-----------------------|------------------|---------------------------------------------|-----------------------------------------------------------------------------------------------------------------------------------------------------|---------------------------------------------------------|--------------------------------------------------------------------------------------------|
| Manojkumar Bhavarilal          | Chopada    |                       |                  | Chopda Medicare and Research Centre Pvt Ltd | Magnum Heart Institute 3 5 Patil Lane No 1 Laxmi Nagar Near KBH Vidyalaya Canada Corner, Nashik, Maharashtra, 422005, India                         | Principal Investigator                                  | Investigators                                                                              |
| Nitin Kamalakar                | Ghaisas    |                       |                  | Siddhi Hospital                             | P-67, Behind ITI Signal Near PF office Trambak Road MIDC Satpur, Nashik, Maharashtra, India, 422007                                                 | Principal Investigator                                  | Investigators                                                                              |
| Rishi                          | Sethi      |                       |                  | King George Medical University              | Department of Cardiology-1st Flr, Shah Mina Road Chowk, Lucknow, Uttar Pradesh, 226003, India                                                       | Principal Investigator                                  | Investigators                                                                              |
| Dinesha                        | Basavanna  |                       |                  | KR Hospital                                 | Department of cardiology South Western Railway Office Near Mysore Railway Station Irwin Rd Medar Block Yadavagiri, Mysore, Karnataka, 570001, India | Principal Investigator                                  | Investigators                                                                              |
| Tom                            | Devasia    |                       |                  | Kasturba Medical College and Hospital       | Manipal university, Manipal, Karnataka, 576104, India                                                                                               | Principal Investigator                                  | Investigators                                                                              |

## Supplemental Online Content: Nonauthor Collaborators

\*Indicates required information. Only first name, last name, and suffix will appear in PubMed.

| First Name and Middle Initial* | *Last Name | *Suffix (eg, Jr, III) | Academic Degrees | Institution                                           | Location (city, state/province, country)                                                                     | Role or Contribution, eg, chair, principal investigator | Group (if more than 1 Group listed in the byline) and/or Subgroup (eg, Steering Committee) |
|--------------------------------|------------|-----------------------|------------------|-------------------------------------------------------|--------------------------------------------------------------------------------------------------------------|---------------------------------------------------------|--------------------------------------------------------------------------------------------|
| Devendra Kumar                 | Agarwal    |                       |                  | S.P. Medical college & A.G. Hospital                  | Department of Cardiology, Bikaner, Rajasthan, 334003, India                                                  | Principal Investigator                                  | Investigators                                                                              |
| Nirav Chandulal                | Bhalani    |                       |                  | Rhythm Heart Institute                                | Near Siddharth Bunglows Sama Savli Road, Vadodara, Gujarat, 390022, India                                    | Principal Investigator                                  | Investigators                                                                              |
| Urmil Girishbhai               | Shah       |                       |                  | Care Institute of Medical Sciences                    | Opposite Panchamurt Bungalow Nr. Shukan Mall, Off Science City Road, Sola, Ahmedabad, Gujarat, 380060, India | Principal Investigator                                  | Investigators                                                                              |
| Bharat Bhushan                 | Chanana    |                       |                  | Maharaja Agrasen Hospital                             | West Punjabi Bagh, New Delhi, 110026, India                                                                  | Principal Investigator                                  | Investigators                                                                              |
| Sunil Nilkanthrao              | Washimkar  |                       |                  | Government Medical College & Superspeciality Hospital | Department of Cardiology Tukdoji Square, Nagpur, Maharashtra, 440009, India                                  | Principal Investigator                                  | Investigators                                                                              |
| Tamir                          | Bental     |                       |                  | Dgani Clinic Clalit Health Services                   | Sderot Haherut 7 3842207, Hadera, 3842207, Israel                                                            | Principal Investigator                                  | Investigators                                                                              |
| Sorel                          | Goland     |                       |                  | Kaplan Hospital                                       | Pasternak St PO Box 1, Rehovot, 76100, Israel                                                                | Principal Investigator                                  | Investigators                                                                              |
| Zaher                          | Azzam      |                       |                  | Rambam Medical Center                                 | Haliya Hashniya 8, Haifa, 31096, Israel                                                                      | Principal Investigator                                  | Investigators                                                                              |

## Supplemental Online Content: Nonauthor Collaborators

\*Indicates required information. Only first name, last name, and suffix will appear in PubMed.

| First Name and Middle Initial* | *Last Name | *Suffix (eg, Jr, III) | Academic Degrees | Institution                                                 | Location (city, state/province, country)                       | Role or Contribution, eg, chair, principal investigator | Group (if more than 1 Group listed in the byline) and/or Subgroup (eg, Steering Committee) |
|--------------------------------|------------|-----------------------|------------------|-------------------------------------------------------------|----------------------------------------------------------------|---------------------------------------------------------|--------------------------------------------------------------------------------------------|
| Jean Marc                      | Weinstein  |                       |                  | Soroka Medical Center                                       | POB 151, Be'er Sheva, 84101, Israel                            | Principal Investigator                                  | Investigators                                                                              |
| Eli                            | Magen      |                       |                  | Barzilai Medical Centre                                     | Internal medicine C 2 Hahistadrout St, Ashkelon, 78306, Israel | Principal Investigator                                  | Investigators                                                                              |
| Tuvia Ben                      | Gal        |                       |                  | Rabin Medical Center Campus                                 | Ze ev Jabotinsky Rd 39, Petach Tikva, 4941492, Israel          | Principal Investigator                                  | Investigators                                                                              |
| Alessandro                     | Fucili     |                       |                  | Azienda Ospdealiero universitaria S.Anna                    | Via Aldo Moro 8, Cona, FE, 44124, Italy                        | Principal Investigator                                  | Investigators                                                                              |
| Roberto Franco Enrico          | Pedretti   |                       |                  | Pedretti                                                    | Via Milanese 300, Sesto San Giovanni, MI, 20099, Italy         | Principal Investigator                                  | Investigators                                                                              |
| Stefano De                     | Servi      |                       |                  | Pedretti                                                    | Via Milanese 300, Sesto San Giovanni, MI, 20099, Italy         | Principal Investigator                                  | Investigators                                                                              |
| Barbara                        | Baronio    |                       |                  | Pedretti                                                    | Via Milanese 300, Sesto San Giovanni, MI, 20099, Italy         | Principal Investigator                                  | Investigators                                                                              |
| Edoardo                        | Gronda     |                       |                  | Pedretti                                                    | Via Milanese 300, Sesto San Giovanni, MI, 20099, Italy         | Principal Investigator                                  | Investigators                                                                              |
| Mario                          | Barbagallo |                       |                  | Az Osp Univ Policlinico P Giaccone Universita Studi Palermo | Via Del Vespro, 129, Palermo, 90127, Italy                     | Principal Investigator                                  | Investigators                                                                              |

## Supplemental Online Content: Nonauthor Collaborators

\*Indicates required information. Only first name, last name, and suffix will appear in PubMed.

| First Name and Middle Initial* | *Last Name   | *Suffix (eg, Jr, III) | Academic Degrees | Institution                                                                              | Location (city, state/province, country)                          | Role or Contribution, eg, chair, principal investigator | Group (if more than 1 Group listed in the byline) and/or Subgroup (eg, Steering Committee) |
|--------------------------------|--------------|-----------------------|------------------|------------------------------------------------------------------------------------------|-------------------------------------------------------------------|---------------------------------------------------------|--------------------------------------------------------------------------------------------|
| Alberto                        | Margonato    |                       |                  | Ospedale San Raffaele IRCCS S R L                                                        | Via Olgettina #60, Milano, 20132, Italy                           | Principal Investigator                                  | Investigators                                                                              |
| Franco                         | Cosmi        |                       |                  | P.O. Ospedale Valdichiana S. Margherita                                                  | N.A. La Fratta,145, Cortona, AR, 52044, Italy                     | Principal Investigator                                  | Investigators                                                                              |
| Cristina                       | Giannattasio |                       |                  | ASST Grande Ospedale Metropolitano Niguarda                                              | Riabilitativa Piazza dell Ospedale Maggiore, Milano, 20162, Italy | Principal Investigator                                  | Investigators                                                                              |
| Daniela                        | Pavan        |                       |                  | Azienda per l' assistenza sanitaria n5 friuli occidentale Az. Osp. S. Maria degli Angeli | Via Savorgnano 2, San Vito al Tagliamento, PN, 33078, Italy       | Principal Investigator                                  | Investigators                                                                              |
| Alberto                        | Mazza        |                       |                  | Ospedale Santa Maria della Misericordia                                                  | Via Tre Martiri, 140, Rovigo, RO, 45100, Italy                    | Principal Investigator                                  | Investigators                                                                              |
| Emilio                         | Ramazzina    |                       |                  | Ospedale Santa Maria della Misericordia                                                  | Via Tre Martiri, 140, Rovigo, RO, 45100, Italy                    | Principal Investigator                                  | Investigators                                                                              |
| Michele                        | Senni        |                       |                  | ASST Papa Giovanni XXIII                                                                 | Piazza OMS 1, Bergamo, 24127, Italy                               | Principal Investigator                                  | Investigators                                                                              |
| Corinna Antonia                | Inserra      |                       |                  | ASST Ovest Milanese Az. Osped. Ospedale Civile di Legnano                                | Via Papa Giovanni Paolo II, Legnano, MI, 20025, Italy             | Principal Investigator                                  | Investigators                                                                              |
| Giuseppe                       | Argiolas     |                       |                  | Azienda Ospedaliero Universitaria di Sassari                                             | Viale S Pietro 8, Sassari, SS, 07100, Italy                       | Principal Investigator                                  | Investigators                                                                              |
| Claudio                        | Borghi       |                       |                  | Az Osp di Bologna Policl S Orsola Malpighi Univ degli Studi                              | Via Albertoni 15, Bologna, BO, 40138, Italy                       | Principal Investigator                                  | Investigators                                                                              |



## Supplemental Online Content: Nonauthor Collaborators

\*Indicates required information. Only first name, last name, and suffix will appear in PubMed.

| First Name and Middle Initial* | *Last Name  | *Suffix (eg, Jr, III) | Academic Degrees | Institution                                                      | Location (city, state/province, country)                                                  | Role or Contribution, eg, chair, principal investigator | Group (if more than 1 Group listed in the byline) and/or Subgroup (eg, Steering Committee) |
|--------------------------------|-------------|-----------------------|------------------|------------------------------------------------------------------|-------------------------------------------------------------------------------------------|---------------------------------------------------------|--------------------------------------------------------------------------------------------|
| Iveta                          | Sime        |                       |                  | Ltd Meissana                                                     | Slimnicas street 25, Liepaja, 3414, Latvia                                                | Principal Investigator                                  | Investigators                                                                              |
| Irina                          | Veze        |                       |                  | Health Center 4                                                  | Brivibas str. 180, Riga, 1012, Latvia                                                     | Principal Investigator                                  | Investigators                                                                              |
| Lija                           | Mora        |                       |                  | L. Mora's Private Practice                                       | Meza prosp 9, Ogre, 5001, Latvia                                                          | Principal Investigator                                  | Investigators                                                                              |
| Natalja                        | Pontaga     |                       |                  | Daugavpils Regional Hospital LTD                                 | Vasarnicu street 20, Daugavpils, 5417, Latvia                                             | Principal Investigator                                  | Investigators                                                                              |
| Jurgita                        | Plisiene    |                       |                  | HoLUoHS Kauno klinikos Kaunas                                    | Cardiology Clinic Eiveniu Str 2, Kaunas, 05161, Lithuania                                 | Principal Investigator                                  | Investigators                                                                              |
| Jelena                         | Celutkiene  |                       |                  | VUH Santaros klinikos                                            | Cardiology and Angiology Santariskiu street 2 Cabinet no. 227, Vilnius, 08661, Lithuania  | Principal Investigator                                  | Investigators                                                                              |
| Leone                          | Cepinskiene |                       |                  | Kaunas Clinical Hospital                                         | Josvainiu str. 2, Kaunas, 47144, Lithuania                                                | Principal Investigator                                  | Investigators                                                                              |
| Jose Luis Arenas               | Leon        |                       |                  | Centro de Atencion e Investigacion Cardiovascular del Potosi S.C | Antonio Aguilar 155 Piso 1 int L Col Burocrata del Estado, San Luis Potosi, 78200, Mexico | Principal Investigator                                  | Investigators                                                                              |
| Salvador                       | Leon        |                       |                  | Centro de Estudios Clinicos de Queretaro S C                     | Av Reforma No 23 Interior 1 er piso Col Centro, Queretaro, 76000, Mexico                  | Principal Investigator                                  | Investigators                                                                              |

## Supplemental Online Content: Nonauthor Collaborators

\*Indicates required information. Only first name, last name, and suffix will appear in PubMed.

| First Name and Middle Initial* | *Last Name | *Suffix (eg, Jr, III) | Academic Degrees | Institution                                         | Location (city, state/province, country)                                       | Role or Contribution, eg, chair, principal investigator | Group (if more than 1 Group listed in the byline) and/or Subgroup (eg, Steering Committee) |
|--------------------------------|------------|-----------------------|------------------|-----------------------------------------------------|--------------------------------------------------------------------------------|---------------------------------------------------------|--------------------------------------------------------------------------------------------|
| Francisco                      | Padilla    |                       |                  | Francisco Gerardo Padilla                           | Padilla, Tarascos 3469 517 Fracc Monraz, Guadalajara, Jalisco, 44670, Mexico   | Principal Investigator                                  | Investigators                                                                              |
| Ricardo Campos                 | Cerda      |                       |                  | Centro de Atención de Enfermedades Cardiopulmonares | Garibaldi 880 Int. 9 1er piso. Col. Jesús, Guadalajara, Jalisco, 44200, Mexico | Principal Investigator                                  | Investigators                                                                              |
| Gerard                         | Linssen    |                       |                  | Ziekenhuisgroep Twente Almelo                       | Zilvermeeuw 1, Almelo, 7609PP, Netherlands                                     | Principal Investigator                                  | Investigators                                                                              |
| Annemieke                      | Jansen     |                       |                  | Groene Hart Ziekenhuis                              | Gouda, Bleulandweg 10, Gouda, Zuid-Holland, 2803HH, Netherlands                | Principal Investigator                                  | Investigators                                                                              |
| Walter                         | Hermans    |                       |                  | ETZ                                                 | Hilvarenbeekseweg 60, Tilburg, Noord-Brabant, 5022GC, Netherlands              | Principal Investigator                                  | Investigators                                                                              |
| Louise                         | Bellersen  |                       |                  | Radboudumc                                          | Geert Grooteplein Zuid 10, Nijmegen, Gelderland, 6525GA, Netherlands           | Principal Investigator                                  | Investigators                                                                              |
| Peter Van der                  | Meer       |                       |                  | Universitair Medisch Centrum Groningen              | Room E0 08 HPC AB40 Hanzeplein 1, Groningen, 9713GZ, Netherlands               | Principal Investigator                                  | Investigators                                                                              |
| Dirk J.A.                      | Lok        |                       |                  | Deventer Ziekenhuis                                 | Niko Bolkensteinlaan 75, Deventer, Overijssel, 7416SE, Netherlands             | Principal Investigator                                  | Investigators                                                                              |

## Supplemental Online Content: Nonauthor Collaborators

\*Indicates required information. Only first name, last name, and suffix will appear in PubMed.

| First Name and Middle Initial* | *Last Name | *Suffix (eg, Jr, III) | Academic Degrees | Institution                         | Location (city, state/province, country)                                                            | Role or Contribution, eg, chair, principal investigator | Group (if more than 1 Group listed in the byline) and/or Subgroup (eg, Steering Committee) |
|--------------------------------|------------|-----------------------|------------------|-------------------------------------|-----------------------------------------------------------------------------------------------------|---------------------------------------------------------|--------------------------------------------------------------------------------------------|
| Marlon                         | Olimulder  |                       |                  | Saxenburgh Groep locatie Hardenberg | Jan Weitkamplaan 4a, Hardenberg, Overijssel, 7772SE, Netherlands                                    | Principal Investigator                                  | Investigators                                                                              |
| J.M.C. van                     | Hal        |                       |                  | Slingeland Ziekenhuis               | Kruisbergseweg 25, Doetinchem, Gelderland, 7009BL, Netherlands                                      | Principal Investigator                                  | Investigators                                                                              |
| Roel                           | Troquay    |                       |                  | Viecuri Ziekenhuis                  | Tegelseweg 210, Venlo, Limburg, 5912BL, Netherlands                                                 | Principal Investigator                                  | Investigators                                                                              |
| Mihaly                         | de Bie     |                       |                  | Treant Zorggroep                    | Locatie Refaja Ziekenhuis Boerhaavestraat 1, Stadskanaal, Groningen, 9501HE, Netherlands            | Principal Investigator                                  | Investigators                                                                              |
| Loek van                       | Heerebeek  |                       |                  | Onze Lieve Vrouwe Gasthuis          | Secretariaat cardiologie research N3 59 Oosterpark 9, Amsterdam, Noord-Holland, 1091AC, Netherlands | Principal Investigator                                  | Investigators                                                                              |
| Roger Martin Correa            | Flores     |                       |                  | Clinica Providencia                 | Calle Carlos Gonzales No 250 Urb Maranga, San Miguel, Lima, 32, Peru                                | Principal Investigator                                  | Investigators                                                                              |
| Dr. Luis Alberto               | Camacho    |                       |                  | Clinica Peruano Americana           | Av Mansiche 810 Of 324, Trujillo, La Libertad, 13011, Peru                                          | Principal Investigator                                  | Investigators                                                                              |

## Supplemental Online Content: Nonauthor Collaborators

\*Indicates required information. Only first name, last name, and suffix will appear in PubMed.

| First Name and Middle Initial* | *Last Name | *Suffix (eg, Jr, III) | Academic Degrees | Institution                                        | Location (city, state/province, country)                             | Role or Contribution, eg, chair, principal investigator | Group (if more than 1 Group listed in the byline) and/or Subgroup (eg, Steering Committee) |
|--------------------------------|------------|-----------------------|------------------|----------------------------------------------------|----------------------------------------------------------------------|---------------------------------------------------------|--------------------------------------------------------------------------------------------|
| Aldo                           | Rodriguez  |                       |                  | Hospital Nacional Alberto Sabogal Sologuren        | Av Colina 1081, Callao, CALLAO2, Peru                                | Principal Investigator                                  | Investigators                                                                              |
| Walter                         | Alarco     |                       |                  | Instituto Nacional Cardiovascular de Essalud INCOR | JCoronel Zegarra 417, Jesus Maria, Lima, 11, Peru                    | Principal Investigator                                  | Investigators                                                                              |
| Libia Isabel                   | Lu         |                       |                  | Clinica Javier Prado                               | Calle las Orquideas N 365, San Isidro, Lima, 27, Peru                | Principal Investigator                                  | Investigators                                                                              |
| Juan Jorge Alfredo Lema        | Osores     |                       |                  | Hospital Nacional Arzobispo Loayza                 | Av Alfonso Ugarte 848, Cercado de Lima, Lima, 01, Peru               | Principal Investigator                                  | Investigators                                                                              |
| Walter                         | Cabrera    |                       |                  | Clinica Vesalio                                    | Calle Jose Thompson N 140 Urb Santo Tomas, San Borja, Lima, 41, Peru | Principal Investigator                                  | Investigators                                                                              |
| Antonio                        | Gaspar     |                       |                  | Hospital de Braga                                  | Lugar das Sete Fontes Sao Victor, Braga, 4710-243, Portugal          | Principal Investigator                                  | Investigators                                                                              |
| Juliana                        | Martins    |                       |                  | Hospital de Braga                                  | Lugar das Sete Fontes Sao Victor, Braga, 4710-243, Portugal          | Principal Investigator                                  | Investigators                                                                              |
| Pedro                          | Sarmiento  |                       |                  | Hospital da Luz                                    | Avenida Lusida 100, Lisboa, 1500-650, Portugal                       | Principal Investigator                                  | Investigators                                                                              |

## Supplemental Online Content: Nonauthor Collaborators

\*Indicates required information. Only first name, last name, and suffix will appear in PubMed.

| First Name and Middle Initial* | *Last Name | *Suffix (eg, Jr, III) | Academic Degrees | Institution                                                | Location (city, state/province, country)                                                                                      | Role or Contribution, eg, chair, principal investigator | Group (if more than 1 Group listed in the byline) and/or Subgroup (eg, Steering Committee) |
|--------------------------------|------------|-----------------------|------------------|------------------------------------------------------------|-------------------------------------------------------------------------------------------------------------------------------|---------------------------------------------------------|--------------------------------------------------------------------------------------------|
| Candida                        | Fonseca    |                       |                  | Centro Hosp Lisboa Ocidental                               | EPE Hosp Sao Francisco Xavier, Hospital de Sao Francisco Xavier Estrada do Forte do Alto do Duque, Lisboa, 1495-005, Portugal | Principal Investigator                                  | Investigators                                                                              |
| Dulce                          | Brito      |                       |                  | Centro Hospitalar de Lisboa Norte Hospital Santa Maria     | Hospital de Santa Maria Av. Prof. Dr. Egas Moniz Cardiologia Piso 8, Lisboa, 1600-190, Portugal                               | Principal Investigator                                  | Investigators                                                                              |
| Irene                          | Marques    |                       |                  | Centro Hospitalar do Porto Hospital Geral de Santo Antonio | Largo Professor Abel Salazar, Porto, 4099-001, Portugal                                                                       | Principal Investigator                                  | Investigators                                                                              |
| Silvia                         | Leao       |                       |                  | Centro Hospitalar De Tras os Montes e Alto Douro           | Avenida da Noruega, Vila Real, 5000-508, Portugal                                                                             | Principal Investigator                                  | Investigators                                                                              |
| Ana                            | Nascimento |                       |                  | Unidade Local de Saude do Alto Minho ULSAM E P E           | Hospital de Santa Luzia Estrada de Santa Luzia, Viana do Castelo, 4901-858, Portugal                                          | Principal Investigator                                  | Investigators                                                                              |
| Aurora                         | Andrade    |                       |                  | Centro Hospitalar Tamega e Sousa E.P.E. Hosp Padre         | Lugar do Tapadinho , Guilhufe, Penafiel, 4564-007, Portugal                                                                   | Principal Investigator                                  | Investigators                                                                              |
| Nicoleta Cindea                | Nica       |                       |                  | Centrul Medical Humanitas                                  | Str Spartachiadei Nr 13 sect 6, Bucuresti, 062272, Romania                                                                    | Principal Investigator                                  | Investigators                                                                              |

## Supplemental Online Content: Nonauthor Collaborators

\*Indicates required information. Only first name, last name, and suffix will appear in PubMed.

| First Name and Middle Initial* | *Last Name   | *Suffix (eg, Jr, III) | Academic Degrees | Institution                                      | Location (city, state/province, country)                               | Role or Contribution, eg, chair, principal investigator | Group (if more than 1 Group listed in the byline) and/or Subgroup (eg, Steering Committee) |
|--------------------------------|--------------|-----------------------|------------------|--------------------------------------------------|------------------------------------------------------------------------|---------------------------------------------------------|--------------------------------------------------------------------------------------------|
| Gabriela Valentina             | Ciobotaru    |                       |                  | Private Medical Center Medicalis                 | Cernauti Street No 13, Timisoara, Timis, 300362, Romania               | Principal Investigator                                  | Investigators                                                                              |
| Simona Iuliana                 | Coman        |                       |                  | SC Mediab SRL                                    | Str Gh Marinescu nr 8A, Targu Mures, Mures, 540142, Romania            | Principal Investigator                                  | Investigators                                                                              |
| Iulian                         | Copaci       |                       |                  | Clinica Medicala Data Plus                       | Str Prof Grigore Cobalcescu nr 35 sector 1, Bucuresti, 062272, Romania | Principal Investigator                                  | Investigators                                                                              |
| Alina                          | Dumitrascu   |                       |                  | Sf Pantelimon Emergency Hospital                 | 340 342 Pantelimon Avenue 2, Bucharest, 021659, Romania                | Principal Investigator                                  | Investigators                                                                              |
| Laura                          | Iosipescu    |                       |                  | Spitalul Judetean de Urgenta Bacau               | Str Spiru Haret nr 2 4, Bacau, 600114, Romania                         | Principal Investigator                                  | Investigators                                                                              |
| Ruxandra                       | Jurcut       |                       |                  | Prof CC Iliescu Institute Bucuresti              | Soseaua Fundeni No 258 sector 2, Bucuresti, 022328, Romania            | Principal Investigator                                  | Investigators                                                                              |
| Constantin                     | Militaru     |                       |                  | Spitalul Clinic Judetean de Urgenta Craiova      | Str Tabaci nr1, Craiova, Dolj, 200642, Romania                         | Principal Investigator                                  | Investigators                                                                              |
| Cristian                       | Podoleanu    |                       |                  | Cabinet Medical Individual Dr Podoleanu Cristian | Aleea Cornisa nr 5 4, Targu Mures, Mures, 540143, Romania              | Principal Investigator                                  | Investigators                                                                              |
| Gabriela                       | Stanciulescu |                       |                  | Spitalul Judetean Urgenta Pitesti                | Str Aleea Spitalului nr 36, Pitesti, Arges, 110084, Romania            | Principal Investigator                                  | Investigators                                                                              |
| Mirela Cleopatra               | Tomescu      |                       |                  | Spitalul Clinic Municipal de Urgenta Timisoara   | Bd Revolutiei din 1989 nr 12, Timisoara, Timis, 300041, Romania        | Principal Investigator                                  | Investigators                                                                              |

## Supplemental Online Content: Nonauthor Collaborators

\*Indicates required information. Only first name, last name, and suffix will appear in PubMed.

| First Name and Middle Initial* | *Last Name  | *Suffix (eg, Jr, III) | Academic Degrees | Institution                                         | Location (city, state/province, country)                                                               | Role or Contribution, eg, chair, principal investigator | Group (if more than 1 Group listed in the byline) and/or Subgroup (eg, Steering Committee) |
|--------------------------------|-------------|-----------------------|------------------|-----------------------------------------------------|--------------------------------------------------------------------------------------------------------|---------------------------------------------------------|--------------------------------------------------------------------------------------------|
| Mariana                        | Tudoran     |                       |                  | Spitalul Clinic Judetean de Urgenta Pius Brinzeu    | Bulevardul Liviu Rebreanu 156, Timisoara, Timis, 300736, Romania                                       | Principal Investigator                                  | Investigators                                                                              |
| Olga Cristina                  | Voicu       |                       |                  | Spitalul Judetean de Urgenta Targoviste             | Str Tudor Vladimirescu nr 48, Tirgoviste, Dambovita, 130095, Romania                                   | Principal Investigator                                  | Investigators                                                                              |
| Alina                          | Giuca       |                       |                  | Neurocord Medical SRL                               | Str Petre Carp nr 5A, Craiova, Dolj, 200383, Romania                                                   | Principal Investigator                                  | Investigators                                                                              |
| Corina Delia                   | Mercea      |                       |                  | Cabinet Medical Cardiologie Dr. Mercea Corina Delia | Bd Independentei nr 10 43, Baia Mare, Maramures, 430123, Romania                                       | Principal Investigator                                  | Investigators                                                                              |
| Iulia                          | Teodorescu  |                       |                  | Spitalul Clinic de Urgenta Sf.Ioan                  | Sos Vitan Barzesti nr 13 Sector 4, Bucuresti, District 4, 042122, Romania                              | Principal Investigator                                  | Investigators                                                                              |
| Yury Grigorievich              | Shvarts     |                       |                  | Saratov State Medical University of Roszdrav        | 137 Bolshaya Sadovaya Str Clinical Hospital 3 b9 4th Floor, Saratov, 410054, Russia                    | Principal Investigator                                  | Investigators                                                                              |
| Ludmila Ivanovna               | Gapon       |                       |                  | Tyumen Cardiological Center                         | 111, Melnikaite, Tyumen, 625026, Russia                                                                | Principal Investigator                                  | Investigators                                                                              |
| Nadezda Vladimirovna           | Izmozherova |                       |                  | Ural State Medical University                       | 34 , Serafimiy Deryabinoy str, based in Central City Clinical Hospital 6, Ekaterinburg, 620149, Russia | Principal Investigator                                  | Investigators                                                                              |

## Supplemental Online Content: Nonauthor Collaborators

\*Indicates required information. Only first name, last name, and suffix will appear in PubMed.

| First Name and Middle Initial* | *Last Name | *Suffix (eg, Jr, III) | Academic Degrees | Institution                                      | Location (city, state/province, country)                                                            | Role or Contribution, eg, chair, principal investigator | Group (if more than 1 Group listed in the byline) and/or Subgroup (eg, Steering Committee) |
|--------------------------------|------------|-----------------------|------------------|--------------------------------------------------|-----------------------------------------------------------------------------------------------------|---------------------------------------------------------|--------------------------------------------------------------------------------------------|
| Larisa Anatolievna             | Khaisheva  |                       |                  | Rostov on Don City Hospital of Emergency Care #2 | 88/ 35,Bodraya str., Rostov on Don, 344068, Russia                                                  | Principal Investigator                                  | Investigators                                                                              |
| Vladimir Pavlovich             | Nosov      |                       |                  | Nizhniy Novgorod Medical Academy                 | 190 ul Rodionova, Nizhnii Novgorod, 603126, Russia                                                  | Principal Investigator                                  | Investigators                                                                              |
| Maria Evgenievna               | Mozheiko   |                       |                  | Yaroslavl Regional Hospital of Veterans of Wars  | 40 Uglichskaya Street, Yaroslavl, 150047, Russia                                                    | Principal Investigator                                  | Investigators                                                                              |
| Elena Alekseevna               | Shutemova  |                       |                  | Regional Institution "Cardiological Dispensary"  | 22 Prospekt Sheremetevsky, Ivanovo, 153012, Russia                                                  | Principal Investigator                                  | Investigators                                                                              |
| Dmitry Valerievich             | Privalov   |                       |                  | City clinical Hospital #51                       | 7/33 Alyabieva str, Moscow, 121309, Russia                                                          | Principal Investigator                                  | Investigators                                                                              |
| Andrey                         | Baglikov   |                       |                  | City Hospital #2                                 | Institution of Kaluzhskaya Region Sosnovaya Rosha 2A Socialisticheskaya Str, Kaluga, 248010, Russia | Principal Investigator                                  | Investigators                                                                              |
| Alexander Alexianosovich       | Kastanayan |                       |                  | Rostov on Don State Med University               | 29 Nakhichevansky pereulok, Rostov on Don, 344022, Russia                                           | Principal Investigator                                  | Investigators                                                                              |
| Zhanna                         | Kobalava   |                       |                  | Clinical Hospital #64                            | 61 Vavilova Str, Moscow, 117292, Russia                                                             | Principal Investigator                                  | Investigators                                                                              |
| Natalia Andreevna              | Koziolova  |                       |                  | Perm Regional Hospital of War Veterans           | 6, Podlesnaya str., Perm, 614097, Russia                                                            | Principal Investigator                                  | Investigators                                                                              |



## Supplemental Online Content: Nonauthor Collaborators

\*Indicates required information. Only first name, last name, and suffix will appear in PubMed.

| First Name and Middle Initial* | *Last Name | *Suffix (eg, Jr, III) | Academic Degrees | Institution                                         | Location (city, state/province, country)                                    | Role or Contribution, eg, chair, principal investigator | Group (if more than 1 Group listed in the byline) and/or Subgroup (eg, Steering Committee) |
|--------------------------------|------------|-----------------------|------------------|-----------------------------------------------------|-----------------------------------------------------------------------------|---------------------------------------------------------|--------------------------------------------------------------------------------------------|
| Dmitriy D                      | Zotov      |                       |                  | Clinical Hospital #46                               | 3 ,Starorusskaya str, Saint-Petersburg, 191144, Russia                      | Principal Investigator                                  | Investigators                                                                              |
| Aleksandr                      | Lipchenko  |                       |                  | MA Novaya Bolnitsa                                  | 29 Zavodskaya st, Yekaterinburg, 620109, Russia                             | Principal Investigator                                  | Investigators                                                                              |
| Natalia Nikolaevna             | Burova     |                       |                  | The Institute of human brain n. a. N. P. Bekhtereva | 12 Academician Pavlov str, St Petersburg, 197376, Russia                    | Principal Investigator                                  | Investigators                                                                              |
| Natalia                        | Polezhaeva |                       |                  | Pokrovsky City Hospital                             | 85 Bolshoy prospekt Vasilyevskiy ostrov, Saint Petersburg, 199106, Russia   | Principal Investigator                                  | Investigators                                                                              |
| Iana                           | Pavlova    |                       |                  | Gatchina Clinical Interdistrict Hospital            | 15A, bld. 1, Roshchinskaya str., Leningrad Region, Gatchina, 188300, Russia | Principal Investigator                                  | Investigators                                                                              |
| Lyudmila Grigorievna           | Ermoshkina |                       |                  | Gatchina Clinical Interdistrict Hospital            | 15A, bld. 1, Roshchinskaya str., Leningrad Region, Gatchina, 188300, Russia | Principal Investigator                                  | Investigators                                                                              |
| Konstantin Nikolaevich         | Zrazhevsky |                       |                  | City Hospital 38 n a Semashko                       | 7/2 Gospitalnaya Str Pushkin, St Petersburg, 196601, Russia                 | Principal Investigator                                  | Investigators                                                                              |

## Supplemental Online Content: Nonauthor Collaborators

\*Indicates required information. Only first name, last name, and suffix will appear in PubMed.

| First Name and Middle Initial* | *Last Name    | *Suffix (eg, Jr, III) | Academic Degrees | Institution                                        | Location (city, state/province, country)                                               | Role or Contribution, eg, chair, principal investigator | Group (if more than 1 Group listed in the byline) and/or Subgroup (eg, Steering Committee) |
|--------------------------------|---------------|-----------------------|------------------|----------------------------------------------------|----------------------------------------------------------------------------------------|---------------------------------------------------------|--------------------------------------------------------------------------------------------|
| Svetlana Afanasievna           | Boldueva      |                       |                  | Northwest Medical University n a I I Mechnikov     | Respiratory Bld 24 47 pr Piskarevskiy, Saint Petersburg, 195067, Russia                | Principal Investigator                                  | Investigators                                                                              |
| Evgenia Vladimirovna           | Akatova       |                       |                  | City Clinical Hospital #40                         | 7 Kasatkina str, Moscow, 129301, Russia                                                | Principal Investigator                                  | Investigators                                                                              |
| Sergey Yurievich               | Martsevich    |                       |                  | National Research Center of Preventiv medicine     | Petroverigskii per 10, Moscow, 101953, Russia                                          | Principal Investigator                                  | Investigators                                                                              |
| Svetlana                       | Apostolovic   |                       |                  | Clinical Centre Nis                                | Clinic for cardiovascular diseases, Bulevar dr Zorana Djindjica 48, Nis, 18000, Serbia | Principal Investigator                                  | Investigators                                                                              |
| Srdjan                         | Boskovic      |                       |                  | Institute for Cardiovascular Diseases Dedinje      | Heroja Milana Tepica 1, Belgrade, 11 000, Serbia                                       | Principal Investigator                                  | Investigators                                                                              |
| Goran                          | Davidovic     |                       |                  | Clinical Centre Kragujevac                         | Cardiology Clinic, Zmaj Jovina 30, Kragujevac, 34000, Serbia                           | Principal Investigator                                  | Investigators                                                                              |
| Marina                         | Deljanin-Ilic |                       |                  | Institute Niska Banja                              | Srpskih junaka 2, Niska Banja, 18205, Serbia                                           | Principal Investigator                                  | Investigators                                                                              |
| Aleksandra                     | Ilic          |                       |                  | Institute for Cardiovascular Diseases of Vojvodina | Put dr Goldmana 4, Sremska Kamenica, 21204, Serbia                                     | Principal Investigator                                  | Investigators                                                                              |

## Supplemental Online Content: Nonauthor Collaborators

\*Indicates required information. Only first name, last name, and suffix will appear in PubMed.

| First Name and Middle Initial* | *Last Name | *Suffix (eg, Jr, III) | Academic Degrees | Institution    | Location (city, state/province, country)                                                                   | Role or Contribution, eg, chair, principal investigator | Group (if more than 1 Group listed in the byline) and/or Subgroup (eg, Steering Committee) |
|--------------------------------|------------|-----------------------|------------------|----------------|------------------------------------------------------------------------------------------------------------|---------------------------------------------------------|--------------------------------------------------------------------------------------------|
| Andrej                         | Dzupina    |                       |                  | Alian sro      | Kardiologicka ambulancia, svJakuba 33, Bardejov, 085 01, Slovakia (Slovak Republic)                        | Principal Investigator                                  | Investigators                                                                              |
| Peter                          | Fulop      |                       |                  | Interna SK sro | Kardiologia vnutorne lekarstvo, MUDr. Pribulu 412/4, Svidnik, 089 01, Slovakia (Slovak Republic)           | Principal Investigator                                  | Investigators                                                                              |
| Tomas                          | Jesensky   |                       |                  | AlfaKardio sro | Kardiologicka ambulancia, Roznavska cesta 605/15, Moldava nad Bodvou, 045 01, Slovakia (Slovak Republic)   | Principal Investigator                                  | Investigators                                                                              |
| Jan                            | Nociar     |                       |                  | KARDIO 1 sro   | Namestie republiky 15, Lucenec, 98439, Slovakia (Slovak Republic)                                          | Principal Investigator                                  | Investigators                                                                              |
| Anna                           | Predmerska |                       |                  | MEDIPRED sro   | Ambulancia v specializacnom odbore kardiologia , Sv Jakuba 21, Bardejov, 08501, Slovakia (Slovak Republic) | Principal Investigator                                  | Investigators                                                                              |

## Supplemental Online Content: Nonauthor Collaborators

\*Indicates required information. Only first name, last name, and suffix will appear in PubMed.

| First Name and Middle Initial* | *Last Name  | *Suffix (eg, Jr, III) | Academic Degrees | Institution                                           | Location (city, state/province, country)                                                                 | Role or Contribution, eg, chair, principal investigator | Group (if more than 1 Group listed in the byline) and/or Subgroup (eg, Steering Committee) |
|--------------------------------|-------------|-----------------------|------------------|-------------------------------------------------------|----------------------------------------------------------------------------------------------------------|---------------------------------------------------------|--------------------------------------------------------------------------------------------|
| Jaroslava                      | Schichorova |                       |                  | PANAKEIA sro Amb v odboroch vnutorne lekarstvo geriat | Liscie udolie 57, Bratislava, 842 31, Slovakia (Slovak Republic)                                         | Principal Investigator                                  | Investigators                                                                              |
| Beata                          | Sokolova    |                       |                  | Galenum sro ambulancia vodbore vnutorne lekarstvo     | Rajecka 1-3, Bratislava, 821 07, Slovakia (Slovak Republic)                                              | Principal Investigator                                  | Investigators                                                                              |
| Jana                           | Lukacova    |                       |                  | MEDILUK s r o                                         | Sladkovicova 300, Snina, 09601, Slovakia (Slovak Republic)                                               | Principal Investigator                                  | Investigators                                                                              |
| Rudolf                         | Smik        |                       |                  | MEDIKARD s r o                                        | Holleho 14/D, Presov, 08001, Slovakia (Slovak Republic)                                                  | Principal Investigator                                  | Investigators                                                                              |
| Dagmar                         | Stofkova    |                       |                  | KaCH sro                                              | Ambulancia vnutorneho lekarstva a kardiologie, Andovska 6, Nove Zamky, 94001, Slovakia (Slovak Republic) | Principal Investigator                                  | Investigators                                                                              |
| Veronika                       | Kolikova    |                       |                  | Kardiologicka ambulancia NsP Povazska Bystrica        | Nemocnicna 986, Povazska Bystrica, 01701, Slovakia (Slovak Republic)                                     | Principal Investigator                                  | Investigators                                                                              |
| Juraj                          | Papincak    |                       |                  | Kardiologicka ambulancia Nemocnica sv Michala         | Satinskeho 1, Bratislava, 81108, Slovakia (Slovak Republic)                                              | Principal Investigator                                  | Investigators                                                                              |

## Supplemental Online Content: Nonauthor Collaborators

\*Indicates required information. Only first name, last name, and suffix will appear in PubMed.

| First Name and Middle Initial* | *Last Name | *Suffix (eg, Jr, III) | Academic Degrees | Institution                                  | Location (city, state/province, country)                                                                            | Role or Contribution, eg, chair, principal investigator | Group (if more than 1 Group listed in the byline) and/or Subgroup (eg, Steering Committee) |
|--------------------------------|------------|-----------------------|------------------|----------------------------------------------|---------------------------------------------------------------------------------------------------------------------|---------------------------------------------------------|--------------------------------------------------------------------------------------------|
| Ladislav                       | Sabo       |                       |                  | INTERSTOM sro                                | Cajkovskeho 2, Nitra, 949 11, Slovakia (Slovak Republic)                                                            | Principal Investigator                                  | Investigators                                                                              |
| Lubica                         | Urgeova    |                       |                  | KARDIOMED NZ sro<br>Kardiologicka ambulancia | L. Stura 18, Nove Zamky, 940 70, Slovakia (Slovak Republic)                                                         | Principal Investigator                                  | Investigators                                                                              |
| Vladimir                       | Macek      |                       |                  | Kardiologicka ambulancia                     | Starohajska 2, Trnava, 91701, Slovakia (Slovak Republic)                                                            | Principal Investigator                                  | Investigators                                                                              |
| Alexander                      | Klabnik    |                       |                  | ORALEK s.r.o.                                | Kardiologicka ambulancia, ul Cerveneho kriza 62/30, Namestovo, 02901, Slovakia (Slovak Republic)                    | Principal Investigator                                  | Investigators                                                                              |
| Peter                          | Letavay    |                       |                  | Dolnooravska NsP<br>MUDr LN Jegeho           | Kardiologicka ambulancia pri internom oddeleni, Nemocnicna 1944/10, Dolny Kubin, 026 01, Slovakia (Slovak Republic) | Principal Investigator                                  | Investigators                                                                              |
| Ladislav                       | Prochazka  |                       |                  | LA-RO COR sro                                | Kardiologicka ambulancia, Partizanska 12, Handlova, 97251, Slovakia (Slovak Republic)                               | Principal Investigator                                  | Investigators                                                                              |

## Supplemental Online Content: Nonauthor Collaborators

\*Indicates required information. Only first name, last name, and suffix will appear in PubMed.

| First Name and Middle Initial* | *Last Name | *Suffix (eg, Jr, III) | Academic Degrees | Institution                             | Location (city, state/province, country)                                                                                                 | Role or Contribution, eg, chair, principal investigator | Group (if more than 1 Group listed in the byline) and/or Subgroup (eg, Steering Committee) |
|--------------------------------|------------|-----------------------|------------------|-----------------------------------------|------------------------------------------------------------------------------------------------------------------------------------------|---------------------------------------------------------|--------------------------------------------------------------------------------------------|
| Daniela                        | Vinanska   |                       |                  | Interna ambulancia                      | Medispol s.r.o.,<br>Konstantinova 17,<br>Presov, 080 01,<br>Slovakia (Slovak Republic)                                                   | Principal Investigator                                  | Investigators                                                                              |
| Ivan                           | Majercak   |                       |                  | Medical group Kosice sro                | Mudronova 29,<br>Kosice, 040 01,<br>Slovakia (Slovak Republic)                                                                           | Principal Investigator                                  | Investigators                                                                              |
| Antonio Teyes                  | Dominguez  |                       |                  | Hospital de Valme                       | Medicina Interna<br>Planta 7 Ala izq Ctra<br>De Cadiz Km 5489,<br>Sevilla, 41014, Spain                                                  | Principal Investigator                                  | Investigators                                                                              |
| Jose Manuel Garcia             | Pinilla    |                       |                  | Hospital Virgen de la Victoria          | Campus<br>Universitario Teatinos<br>sn. Servicio de<br>Cardiologia 5 Planta<br>(ensayos clinicos),<br>Malaga, Andalucia,<br>29010, Spain | Principal Investigator                                  | Investigators                                                                              |
| Manuel Geraldia                | Lama       |                       |                  | Hospital virgen de las montanas         | Avenida del Ambulatorio s<br>n, Villamartin, Cadiz,<br>11650, Spain                                                                      | Principal Investigator                                  | Investigators                                                                              |
| Julio Nunez                    | Villota    |                       |                  | Hospital Clinico Universitario Valencia | Pabellon B<br>Hemodinamica Planta<br>2 Avda Blasco Ibanez<br>17, Valencia,<br>Comunidad Valenciana, 46010,<br>Spain                      | Principal Investigator                                  | Investigators                                                                              |

## Supplemental Online Content: Nonauthor Collaborators

\*Indicates required information. Only first name, last name, and suffix will appear in PubMed.

| First Name and Middle Initial* | *Last Name | *Suffix (eg, Jr, III) | Academic Degrees | Institution                                | Location (city, state/province, country)                                                                                                                                 | Role or Contribution, eg, chair, principal investigator | Group (if more than 1 Group listed in the byline) and/or Subgroup (eg, Steering Committee) |
|--------------------------------|------------|-----------------------|------------------|--------------------------------------------|--------------------------------------------------------------------------------------------------------------------------------------------------------------------------|---------------------------------------------------------|--------------------------------------------------------------------------------------------|
| Luis Almenar                   | Bonet      |                       |                  | Hospital Universitario i Politecnico La Fe | Avda de Fernando Abril Martorell 106<br>Unidad de Insuficiencia Cardiaca y Trasplante Torre F<br>Planta 4 Despacho 1,<br>Valencia, Comunidad Valenciana, 46026,<br>Spain | Principal Investigator                                  | Investigators                                                                              |
| Jose Ramon Bover               | Freire     |                       |                  | Hospital Clinico San Carlos                | Unidad de Insuficiencia Cardiaca<br>Calle Profesor Martín Lagos, S/N 2 Planta Norte, Madrid, 28040,<br>Spain                                                             | Principal Investigator                                  | Investigators                                                                              |
| Gonzalo Pena                   | Perez      |                       |                  | Hospital San Rafael                        | As Xubias 82, A<br>Coruna, Galicia,<br>15006, Spain                                                                                                                      | Principal Investigator                                  | Investigators                                                                              |
| Domingo Pascual                | Figal      |                       |                  | Hospital Universitario Virgen Arrixaca     | 6ª planta Derecha Ctra.<br>Madrid-Cartagena, sn,<br>El Palmar, Murcia,<br>30120, Spain                                                                                   | Principal Investigator                                  | Investigators                                                                              |
| Fernando Werner                | Diz        |                       |                  | Hospital Arnau de Vilanova                 | 6ª planta<br>Ed. Nuevo, Lerida,<br>Cataluna, 25198,<br>Spain                                                                                                             | Principal Investigator                                  | Investigators                                                                              |

## Supplemental Online Content: Nonauthor Collaborators

\*Indicates required information. Only first name, last name, and suffix will appear in PubMed.

| First Name and Middle Initial* | *Last Name | *Suffix (eg, Jr, III) | Academic Degrees | Institution                                    | Location (city, state/province, country)                                                                                                                                        | Role or Contribution, eg, chair, principal investigator | Group (if more than 1 Group listed in the byline) and/or Subgroup (eg, Steering Committee) |
|--------------------------------|------------|-----------------------|------------------|------------------------------------------------|---------------------------------------------------------------------------------------------------------------------------------------------------------------------------------|---------------------------------------------------------|--------------------------------------------------------------------------------------------|
| Antonio Garcia                 | Quintana   |                       |                  | Hospital Universitario Gran Canaria Dr. Negrín | Barrancos de la Ballena, s/n de la Salud Hospital Universitario de Gran Canaria Dr. Negrin Unidad de Cardiología, planta 5, Las Palmas de Gran Canarias, Canarias, 35010, Spain | Principal Investigator                                  | Investigators                                                                              |
| Jose Diaz                      | Fernandez  |                       |                  | Hospital Juan ramón Jiménez                    | Planta 1 Hemodinamica Ronda Norte s n, Huelva, Andalucía, 21005, Spain                                                                                                          | Principal Investigator                                  | Investigators                                                                              |
| Jorge Gomez                    | Cerezo     |                       |                  | Hospital Universitario Infanta Sofia           | planta 2 UAS 2 despacho 223 Paseo de Europa 34, San Sebastian de los Reyes, Madrid, 28702, Spain                                                                                | Principal Investigator                                  | Investigators                                                                              |
| Julio Blazquez                 | Encinar    |                       |                  | Hospital de Torrevieja                         | planta 0 Carretera Cv 95 sn Torrevieja (Alicante), Comunidad Valenciana, 03186, Spain                                                                                           | Principal Investigator                                  | Investigators                                                                              |
| Francisco Gomez                | Delgado    |                       |                  | Hospital Reina Sofía                           | Avenida Menendez Pidal s/n, Cordoba, Andalucía, 14004, Spain                                                                                                                    | Principal Investigator                                  | Investigators                                                                              |



## Supplemental Online Content: Nonauthor Collaborators

\*Indicates required information. Only first name, last name, and suffix will appear in PubMed.

| First Name and Middle Initial* | *Last Name        | *Suffix (eg, Jr, III) | Academic Degrees | Institution                           | Location (city, state/province, country)                                                        | Role or Contribution, eg, chair, principal investigator | Group (if more than 1 Group listed in the byline) and/or Subgroup (eg, Steering Committee) |
|--------------------------------|-------------------|-----------------------|------------------|---------------------------------------|-------------------------------------------------------------------------------------------------|---------------------------------------------------------|--------------------------------------------------------------------------------------------|
| Pau Llacer                     | Iborra            |                       |                  | Hospital de Manises                   | Avenida Generalitat Valenciana, 50, Manises, Valencia, 46940, Spain                             | Principal Investigator                                  | Investigators                                                                              |
| Francisco Javier Camacho       | Jurad             |                       |                  | Hospital Universitario de Puerto Real | Carretera N IV Km 665, Puerto Real, Cadiz, 11510, Spain                                         | Principal Investigator                                  | Investigators                                                                              |
| Julia                          | Seller            |                       |                  | Hospital Marina Salud Denia           | Part Beniadla s n, Alicante, 03700, Spain                                                       | Principal Investigator                                  | Investigators                                                                              |
| Songsak                        | Kiatchoosakun     |                       |                  | Srinagarind Hospital                  | Cardiology Department 123 Mitraparb Road Naimuang Muang, Khon Kaen, 40002, Thailand             | Principal Investigator                                  | Investigators                                                                              |
| Srisakul                       | Chirakarnjanakorn |                       |                  | Siriraj Hospital                      | 9th floor Her Majesty Queen Sirikit Cardiac Center Mahidol University, Bangkok, 10700, Thailand | Principal Investigator                                  | Investigators                                                                              |
| Nakarin                        | Sansanayudh       |                       |                  | Phramongkutklao Hospital              | Department of Internal medicine 3rd floor Ayuragam salayagam bldg, Bangkok, 10400, Thailand     | Principal Investigator                                  | Investigators                                                                              |
| Suphot                         | Srimahachota      |                       |                  | King Chulalongkorn Memorial Hospital  | 4th floor Bhumisiri Mangkhalanusorn building, Bangkok, 10330, Thailand                          | Principal Investigator                                  | Investigators                                                                              |

## Supplemental Online Content: Nonauthor Collaborators

\*Indicates required information. Only first name, last name, and suffix will appear in PubMed.

| First Name and Middle Initial* | *Last Name  | *Suffix (eg, Jr, III) | Academic Degrees | Institution                                    | Location (city, state/province, country)                                                           | Role or Contribution, eg, chair, principal investigator | Group (if more than 1 Group listed in the byline) and/or Subgroup (eg, Steering Committee) |
|--------------------------------|-------------|-----------------------|------------------|------------------------------------------------|----------------------------------------------------------------------------------------------------|---------------------------------------------------------|--------------------------------------------------------------------------------------------|
| Tomon                          | Thongsri    |                       |                  | Buddhachinaraj Hospital                        | Cardiology<br>90 Srithamatripidok Rd Amphur, Phitsanulok, Muang, 65000, Thailand                   | Principal Investigator                                  | Investigators                                                                              |
| Weera                          | Mahavanakul |                       |                  | Sunpasitthiprasong Hospital                    | Department of Medicine Nai Mueang Muang Ubon Ratchathani, Ubon Ratchathani, Muang, 34000, Thailand | Principal Investigator                                  | Investigators                                                                              |
| Tayfun                         | Sahin       |                       |                  | Kocaeli University Medical Faculty             | Umuttepe Yerleskesi Eski Istanbul Yolu 10 KM, Kocaeli, Umuttepe, 41380, Turkey                     | Principal Investigator                                  | Investigators                                                                              |
| Zerrin                         | Yigit       |                       |                  | Istanbul University Cardiology Institute       | Haseki, Istanbul, 34304, Turkey                                                                    | Principal Investigator                                  | Investigators                                                                              |
| Mehmet                         | Melek       |                       |                  | Bursa Yuksek Ihtisas Hospital                  | 152 Evler mah Prof Tezok cad No 2 Yildirmi, Bursa, Yildirim, 16310, Turkey                         | Principal Investigator                                  | Investigators                                                                              |
| Mustafa                        | Akin        |                       |                  | Ege University Medical Faculty                 | Izmir, Department of Cardiology, Izmir, Bornova, 35100, Turkey                                     | Principal Investigator                                  | Investigators                                                                              |
| Yuksel                         | Cavusoglu   |                       |                  | Eskisehir Osmangazi University Medical Faculty | Department of Cardiology Medical Faculty Odunpazari, Eskisehir, Meselik, 26480, Turkey             | Principal Investigator                                  | Investigators                                                                              |

## Supplemental Online Content: Nonauthor Collaborators

\*Indicates required information. Only first name, last name, and suffix will appear in PubMed.

| First Name and Middle Initial* | *Last Name   | *Suffix (eg, Jr, III) | Academic Degrees | Institution                            | Location (city, state/province, country)                                             | Role or Contribution, eg, chair, principal investigator | Group (if more than 1 Group listed in the byline) and/or Subgroup (eg, Steering Committee) |
|--------------------------------|--------------|-----------------------|------------------|----------------------------------------|--------------------------------------------------------------------------------------|---------------------------------------------------------|--------------------------------------------------------------------------------------------|
| Mevlut                         | Koc          |                       |                  | Adana city hospital                    | Suleyman Demirel Bulvari Kurttepe Mevkii 83027 sk No 9, Adana, Seyhan, 01160, Turkey | Principal Investigator                                  | Investigators                                                                              |
| Ismail Turkey                  | Ozcan        |                       |                  | Mersin University Medical Faculty      | Ciftlikkoy Kampusu Yenisehir, Mersin, Mezitli, 33343, Turkey                         | Principal Investigator                                  | Investigators                                                                              |
| Okan Onur                      | Turgut       |                       |                  | Cumhuriyet University Medical Faculty  | Cumhuriyet Universitesi Yerleskesi, Sivas, Merkez, 58140, Turkey                     | Principal Investigator                                  | Investigators                                                                              |
| Mehmet Birhan                  | Yilmaz       |                       |                  | Cumhuriyet University Medical Faculty  | Cumhuriyet Universitesi Yerleskesi, Sivas, Merkez, 58140, Turkey                     | Principal Investigator                                  | Investigators                                                                              |
| Hakan                          | Altay        |                       |                  | Baskent University Istanbul Hospital   | Altunizade Mah Kisikli Cad Oymaci Sok No 7, Istanbul, Üsküdar, 34662, Turkey         | Principal Investigator                                  | Investigators                                                                              |
| Haldun                         | Muderrisoglu |                       |                  | Baskent University Medical Faculty     | Yukar Bahcelievler Mareal Fevzi Cakmak Cd No 45, Ankara, 06490, Turkey               | Principal Investigator                                  | Investigators                                                                              |
| Ozer                           | Badak        |                       |                  | Dokuz Eylul University Medical Faculty | Inciralti, Izmir, Balçova, 35340, Turkey                                             | Principal Investigator                                  | Investigators                                                                              |

Supplemental Online Content: Nonauthor Collaborators

\*Indicates required information. Only first name, last name, and suffix will appear in PubMed.

| First Name and Middle Initial* | *Last Name    | *Suffix (eg, Jr, III) | Academic Degrees | Institution                                                                              | Location (city, state/province, country)                                                               | Role or Contribution, eg, chair, principal investigator | Group (if more than 1 Group listed in the byline) and/or Subgroup (eg, Steering Committee) |
|--------------------------------|---------------|-----------------------|------------------|------------------------------------------------------------------------------------------|--------------------------------------------------------------------------------------------------------|---------------------------------------------------------|--------------------------------------------------------------------------------------------|
| Tarkan                         | Tekten        |                       |                  | Adnan Menderes University Medical Faculty                                                | Adnan Menderes University Medical Faculty, Aydin, 09100, Turkey                                        | Principal Investigator                                  | Investigators                                                                              |
| Abdurrahman                    | Oguzhan       |                       |                  | Erciyes University Medical Faculty                                                       | Talas Kasyeri, Talas / Kayseri, Melikgazi, 38039, Turkey                                               | Principal Investigator                                  | Investigators                                                                              |
| Murathan                       | Kucuk         |                       |                  | Akdeniz University Medical Faculty                                                       | Akdeniz University Medical Faculty, Antalya, Kampüs, 07070, Turkey                                     | Principal Investigator                                  | Investigators                                                                              |
| Shahid                         | Mahmood       |                       |                  | City Hospitals Sunderland NHS Foundation Trust<br>Sunderland Royal Hospital              | Kayll Road, Sunderland, Tyne and Wear, SR4 7TP, United Kingdom                                         | Principal Investigator                                  | Investigators                                                                              |
| Matthew J                      | Dewhurst      |                       |                  | North Tees & Hartlepool Hospitals NHS Foundation Trust<br>University Hospital North Tees | University Hospital North Tees<br>Hardwick Road, Stockton on Tees, Cleveland, TS19 8PE, United Kingdom | Principal Investigator                                  | Investigators                                                                              |
| N'Jaimeh                       | Asamoah-Owusu |                       |                  | Crouch Oak Family Practice                                                               | 45 Station Road, Addlestone, Surrey, KT15 2BH, United Kingdom                                          | Principal Investigator                                  | Investigators                                                                              |
| Piers                          | Clifford      |                       |                  | Buckinghamshire Healthcare NHS Trust<br>Wycombe General Hospital                         | Queen Alexandra Road, High Wycombe, Buckinghamshire, HP11 2TT, United Kingdom                          | Principal Investigator                                  | Investigators                                                                              |

Supplemental Online Content: Nonauthor Collaborators

\*Indicates required information. Only first name, last name, and suffix will appear in PubMed.

| First Name and Middle Initial* | *Last Name | *Suffix (eg, Jr, III) | Academic Degrees | Institution                                                        | Location (city, state/province, country)                              | Role or Contribution, eg, chair, principal investigator | Group (if more than 1 Group listed in the byline) and/or Subgroup (eg, Steering Committee) |
|--------------------------------|------------|-----------------------|------------------|--------------------------------------------------------------------|-----------------------------------------------------------------------|---------------------------------------------------------|--------------------------------------------------------------------------------------------|
| Amrit                          | Takhar     |                       |                  | Wansford and Kingscliffe GP Surgery                                | Wansford surgery, Wansford, Peterborough, PE8 6PL, United Kingdom     | Principal Investigator                                  | Investigators                                                                              |
| Chris                          | Hayes      |                       |                  | York Teaching Hospital NHS Foundation Trust York District Hospital | Wiggington Road, York, YO31 8HE, United Kingdom                       | Principal Investigator                                  | Investigators                                                                              |
| Andrew                         | Moriarty   |                       |                  | Craigavon Area Hospital                                            | 68 Lurgan Road, Craigavon, Northern Ireland, BT63 5QQ, United Kingdom | Principal Investigator                                  | Investigators                                                                              |
| Klaus                          | Witte      |                       |                  | The Leeds Teaching Hospitals NHS Trust                             | Great George Street, Leeds, LS1 3EX, United Kingdom                   | Principal Investigator                                  | Investigators                                                                              |
| Justin                         | Cooke      |                       |                  | Chesterfield Royal Hospital NHS Foundation Trust                   | Top Road Calow, Chesterfield, Derbyshire, S44 5BL, United Kingdom     | Principal Investigator                                  | Investigators                                                                              |
| Donald                         | Haas       |                       |                  | Abington Memorial Hospital                                         | 1200 Old York Road, Abington, PA, 19001, United States                | Principal Investigator                                  | Investigators                                                                              |
| Edward                         | Portnay    |                       |                  | Cardiology Associates of Fairfield County                          | 1177 Summer Street 5th Floor, Stamford, CT, 06905, United States      | Principal Investigator                                  | Investigators                                                                              |
| Scott                          | Feitell    |                       |                  | Rochester General Hospital / Center for Clinical Research          | 1425 Portland Ave, Rochester, NY, 14621, United States                | Principal Investigator                                  | Investigators                                                                              |

Supplemental Online Content: Nonauthor Collaborators

\*Indicates required information. Only first name, last name, and suffix will appear in PubMed.

| First Name and Middle Initial* | *Last Name | *Suffix (eg, Jr, III) | Academic Degrees | Institution                                   | Location (city, state/province, country)                                    | Role or Contribution, eg, chair, principal investigator | Group (if more than 1 Group listed in the byline) and/or Subgroup (eg, Steering Committee) |
|--------------------------------|------------|-----------------------|------------------|-----------------------------------------------|-----------------------------------------------------------------------------|---------------------------------------------------------|--------------------------------------------------------------------------------------------|
| Christopher S                  | Brown      |                       |                  | Mobile Heart Specialists                      | Mobile, 6701 Airport Boulevard Suite A107, Mobile, AL, 36608, United States | Principal Investigator                                  | Investigators                                                                              |
| Brack                          | Hattler    |                       |                  | Rocky Mountain Regional VA Medical Center     | 1700 North Wheeling Street, Aurora, CO, 80045, United States                | Principal Investigator                                  | Investigators                                                                              |
| Peter                          | Fail       |                       |                  | Cardiovascular Institute of the South         | 225 Dunn Street, Houma, LA, 70360, United States                            | Principal Investigator                                  | Investigators                                                                              |
| Tariq                          | Haddad     |                       |                  | Virginia Heart Falls Church                   | 2901 Telestar Court Suite 200, Falls Church, VA, 22042, United States       | Principal Investigator                                  | Investigators                                                                              |
| Bhola                          | Rama       |                       |                  | Rama Research LLC                             | 5 1040 Delaware Avenue, Marion, OH, 43302, United States                    | Principal Investigator                                  | Investigators                                                                              |
| Nikhil                         | Kapoor     |                       |                  | Cardiovascular Innovation and Research Center | 1045 Atlantic Ave Suite 611, Long Beach, CA, 90813, United States           | Principal Investigator                                  | Investigators                                                                              |
| Shamaila                       | Aslam      |                       |                  | Northwest Houston Clinical Research PLLC      | 308 Holderrieth Blvd, Tomball, TX, 77375, United States                     | Principal Investigator                                  | Investigators                                                                              |
| Michael                        | Peters     |                       |                  | Methodist Physicians Clinic Heart Consultants | 1120 North 103rd Plaza Suite 100, Omaha, NE, 68114, United States           | Principal Investigator                                  | Investigators                                                                              |

Supplemental Online Content: Nonauthor Collaborators

\*Indicates required information. Only first name, last name, and suffix will appear in PubMed.

| First Name and Middle Initial* | *Last Name    | *Suffix (eg, Jr, III) | Academic Degrees | Institution                                        | Location (city, state/province, country)                                    | Role or Contribution, eg, chair, principal investigator | Group (if more than 1 Group listed in the byline) and/or Subgroup (eg, Steering Committee) |
|--------------------------------|---------------|-----------------------|------------------|----------------------------------------------------|-----------------------------------------------------------------------------|---------------------------------------------------------|--------------------------------------------------------------------------------------------|
| Eulogio                        | Sanchez       |                       |                  | Cardiovascular and Vein Center of Florida          | 6100 Pointe West Boulevard, Bradenton, FL, 34209, United States             | Principal Investigator                                  | Investigators                                                                              |
| Sridhar                        | Vijayasekaran |                       |                  | Samaritan Heart and Vascular Institute             | 3640 NW Samaritan Drive Suite E 350, Corvallis, OR, 97330, United States    | Principal Investigator                                  | Investigators                                                                              |
| Steven D                       | Lupovitch     |                       |                  | Northwest Heart Clinical Research LLC              | 1632 West Central Road, Arlington Heights, Illinois, 60005, United States   | Principal Investigator                                  | Investigators                                                                              |
| Orvar                          | Jonsson       |                       |                  | Sanford University of South Dakota Medical Center  | 1018 W 18th Street, Sioux Falls, SD, 57104, United States                   | Principal Investigator                                  | Investigators                                                                              |
| Carsten                        | Schmalfluss   |                       |                  | North Florida/South Georgia Veterans Health System | 1601 SW Archer Road Room Number 151, Gainesville, FL, 32608, United States  | Principal Investigator                                  | Investigators                                                                              |
| Anuj                           | Jain          |                       |                  | Nebraska Heart Institute Medical Office Bldg       | 7440 South 91st Street, Lincoln, NE, 68526, United States                   | Principal Investigator                                  | Investigators                                                                              |
| Gina                           | Mentzer       |                       |                  | Nebraska Heart Institute Medical Office Bldg       | 7440 South 91st Street, Lincoln, NE, 68526, United States                   | Principal Investigator                                  | Investigators                                                                              |
| Norman                         | Lepor         |                       |                  | Westside Medical Associates of Los Angeles         | 99 North La Cienega Blvd Suite 203, Beverly Hills, CA, 90211, United States | Principal Investigator                                  | Investigators                                                                              |

Supplemental Online Content: Nonauthor Collaborators

\*Indicates required information. Only first name, last name, and suffix will appear in PubMed.

| First Name and Middle Initial* | *Last Name          | *Suffix (eg, Jr, III) | Academic Degrees | Institution                                      | Location (city, state/province, country)                                                       | Role or Contribution, eg, chair, principal investigator | Group (if more than 1 Group listed in the byline) and/or Subgroup (eg, Steering Committee) |
|--------------------------------|---------------------|-----------------------|------------------|--------------------------------------------------|------------------------------------------------------------------------------------------------|---------------------------------------------------------|--------------------------------------------------------------------------------------------|
| John                           | Mignone             |                       |                  | Swedish Medical Center/Cardiovascular Research   | 500 17th Avenue Cherry Hill Professional Building Suite 303, Seattle, WA, 98122, United States | Principal Investigator                                  | Investigators                                                                              |
| Waymon                         | Drummond            |                       |                  | Renaissance Clinical Research & Hypertension     | 9 Medical Parkway Plaza 4 Suite 308, Dallas, TX, 75234, United States                          | Principal Investigator                                  | Investigators                                                                              |
| Jonathan                       | Soverow             |                       |                  | Olive View UCLA Education and Research Institute | 14445 Olive View Drive Room 2C121, Sylmar, CA, 91342, United States                            | Principal Investigator                                  | Investigators                                                                              |
| Hanna                          | Gaggin              |                       |                  | Massachusetts General Hospital                   | Harvard Medical School 55 Fruit Street, Boston, MA, 02114, United States                       | Principal Investigator                                  | Investigators                                                                              |
| Robert I                       | Garver              |                       |                  | SEC Clinical Research LLC                        | 822 S Three Notch St, Andalusia, AL, 36420, United States                                      | Principal Investigator                                  | Investigators                                                                              |
| Melvin                         | Martinez-Castrillon |                       |                  | Infinite Clinical Research                       | 7955 NW 12th Street Suite 400, Doral, FL, 33126, United States                                 | Principal Investigator                                  | Investigators                                                                              |
| Naseem                         | Jaffrani            |                       |                  | Alexandria Cardiology Clinic                     | 501 Medical Center Drive STE 250, Alexandria, LA, 71301, United States                         | Principal Investigator                                  | Investigators                                                                              |



## Supplemental Online Content: Nonauthor Collaborators

\*Indicates required information. Only first name, last name, and suffix will appear in PubMed.

| First Name and Middle Initial* | *Last Name | *Suffix (eg, Jr, III) | Academic Degrees | Institution                                    | Location (city, state/province, country)                                               | Role or Contribution, eg, chair, principal investigator | Group (if more than 1 Group listed in the byline) and/or Subgroup (eg, Steering Committee) |
|--------------------------------|------------|-----------------------|------------------|------------------------------------------------|----------------------------------------------------------------------------------------|---------------------------------------------------------|--------------------------------------------------------------------------------------------|
| Barry D                        | Harris     |                       |                  | Integrative Research Associates Inc            | CACZ885M2301<br>3107 Stirling Road<br>Suite 107, Fort Lauderdale, 33312, United States | Principal Investigator                                  | Investigators                                                                              |
| Marc                           | Bernstein  |                       |                  | Louisiana Heart Center Chalmette               | 8050 W Judge Perez Dr Ste 2500, Chalmette, LA, 70043. United States                    | Principal Investigator                                  | Investigators                                                                              |
| B Clay                         | Sizemore   |                       |                  | John D Archbold Memorial Hospital              | 915 Gordon Avenue, Thomasville, GA, 31792, United States                               | Principal Investigator                                  | Investigators                                                                              |
| Terry                          | Wells      |                       |                  | Angelina Medical Research                      | 121 Gaslight Medical Parkway Suite 102, Lufkin, TX, 75904, United States               | Principal Investigator                                  | Investigators                                                                              |
| Alan Charles                   | Schwartz   |                       |                  | Helping Hands Medical Associates INC           | 2621 S Bristol Suite 307, Santa Ana, CA, 92704, United States                          | Principal Investigator                                  | Investigators                                                                              |
| Mohsin                         | Alhaddad   |                       |                  | Apex Cardiology Research Associates of Jackson | 327 Summar Avenue, Jackson, TN, 38301, United States                                   | Principal Investigator                                  | Investigators                                                                              |
| Alexander                      | White      |                       |                  | Progressive Medical Research                   | 5111 S Ridgewood Avenue Suite 301, Port Orange, FL, 32127, United States               | Principal Investigator                                  | Investigators                                                                              |
| Henry                          | Dargie     |                       |                  | Western Infirmary                              | Glasgow, Scotland, U.K                                                                 | Data Monitoring Committee Chair                         | Data Monitoring Committee                                                                  |

## Supplemental Online Content: Nonauthor Collaborators

\*Indicates required information. Only first name, last name, and suffix will appear in PubMed.

| First Name and Middle Initial* | *Last Name | *Suffix (eg, Jr, III) | Academic Degrees | Institution                                                         | Location (city, state/province, country) | Role or Contribution, eg, chair, principal investigator | Group (if more than 1 Group listed in the byline) and/or Subgroup (eg, Steering Committee) |
|--------------------------------|------------|-----------------------|------------------|---------------------------------------------------------------------|------------------------------------------|---------------------------------------------------------|--------------------------------------------------------------------------------------------|
| Michel                         | Komajda    |                       |                  | Goupe Hospitalier PitieSalpetriere Institut De Cardiologie          | Paris, France                            | Data Monitoring Committee Member                        | Data Monitoring Committee                                                                  |
| Robert                         | Foley      |                       |                  | Chronic Disease Research Group Minneapolis                          | Minnesota, U.S                           | Data Monitoring Committee Member                        | Data Monitoring Committee                                                                  |
| Gary                           | Francis    |                       |                  | University of Minnesota                                             | Minnesota, U.S                           | Data Monitoring Committee Member                        | Data Monitoring Committee                                                                  |
| Stuart                         | Pocock     |                       |                  | London School of Hygiene and Tropical Medicine                      | London, U.K                              | Data Monitoring Committee Member                        | Data Monitoring Committee                                                                  |
| Allen P                        | Kaplan     |                       |                  | Medical University of South Carolina                                | Charleston, South Carolina, U.S          | Angioedema Adjudication Committee Chair                 | Angioedema Adjudication Committee                                                          |
| Nancy                          | Brown      |                       |                  | Vanderbilt School of Medicine                                       | Nashville, Tennessee, U.S                | Angioedema Adjudication Committee Member                | Angioedema Adjudication Committee                                                          |
| Bruce                          | Zuraw      |                       |                  | University of California                                            | San Diego, California, U.S               | Angioedema Adjudication Committee Member                | Angioedema Adjudication Committee                                                          |
| Paula J                        | Busse      |                       |                  | Division of Clinical Immunology, The Mount Sinai School of Medicine | New York, U.S                            | Angioedema Adjudication Committee Member                | Angioedema Adjudication Committee                                                          |
